# Supplementary material
Source: MDPI journal article supplement (https://www.mdpi.com/2312-7481/9/4/102)
Supplement: s1 [file s1]

# **The importance of solvent effects in calculations of NMR coupling constants at the doubles corrected Higher Random-Phase Approximation: Supporting Information**

Louise Møller Jessen,<sup>†</sup> Peter Reinholdt,<sup>‡</sup> Jacob Kongsted,<sup>‡</sup> and Stephan P. A.  
Sauer<sup>\*,†</sup>

*<sup>†</sup>Department of Chemistry, University of Copenhagen, Universitetsparken 5, DK-2100  
Copenhagen Ø, Denmark*

*<sup>‡</sup>Department of Physics, Chemistry and Pharmacy, University of Southern Denmark,  
DK-5230 Odense M, Denmark*

E-mail: sauer@chem.ku.dk

Table S1: SSCC for all the molecules and methods in Hz.

| Molecule | Solvent    | SSCC       | Method               | vacuum-<br>vacuum | vacuum-<br>solvent | solvent-<br>vacuum | solvent-<br>solvent |
|----------|------------|------------|----------------------|-------------------|--------------------|--------------------|---------------------|
| Methanol | Chloroform | $^1J_{CH}$ | SOPPA                | 140.11            | 140.42             | 140.95             | 141.28              |
|          |            |            | HRPA(D)              | 140.15            | 140.46             | 140.98             | 141.31              |
|          |            |            | B3LYP                | 145.63            | 145.98             | 146.40             | 146.76              |
|          |            |            | BHandH               | 135.62            | 135.89             | 136.24             | 136.53              |
|          |            |            | PBE0                 | 135.41            | 135.71             | 136.07             | 136.38              |
|          |            |            | exp <sup>1</sup>     |                   |                    |                    | 141.148             |
| Propene  | Chloroform | $^2J_{HH}$ | SOPPA                | -0.23             | -0.17              | -0.08              | -0.02               |
|          |            |            | HRPA(D)              | 0.08              | 0.13               | 0.21               | 0.27                |
|          |            |            | B3LYP                | 2.58              | 2.67               | 2.77               | 2.85                |
|          |            |            | BHandH               | 1.17              | 1.23               | 1.34               | 1.41                |
|          |            |            | PBE0                 | 1.03              | 1.10               | 1.20               | 1.28                |
|          |            |            | exp <sup>2</sup>     |                   |                    |                    | 2.24                |
|          |            | $^3J_{HH}$ | SOPPA                | 16.96             | 16.96              | 17.08              | 17.07               |
|          |            |            | <i>trans</i> HRPA(D) | 16.13             | 16.13              | 16.26              | 16.25               |
|          |            |            | B3LYP                | 18.36             | 18.33              | 18.53              | 18.51               |
|          |            |            | BHandH               | 17.62             | 17.61              | 17.75              | 17.74               |
|          |            |            | PBE0                 | 18.11             | 18.09              | 18.26              | 18.25               |
|          |            |            | exp <sup>2</sup>     |                   |                    |                    | 17.03               |
|          |            | $^3J_{HH}$ | SOPPA                | 11.29             | 11.26              | 11.36              | 11.33               |
|          |            |            | <i>cis</i> HRPA(D)   | 10.74             | 10.71              | 10.82              | 10.79               |
|          |            |            | B3LYP                | 11.89             | 11.84              | 12.00              | 11.95               |
|          |            |            | BHandH               | 12.42             | 12.38              | 12.52              | 12.47               |
|          |            |            | PBE0                 | 11.68             | 11.63              | 11.77              | 11.73               |
|          |            |            | exp <sup>2</sup>     |                   |                    |                    | 10.089              |

Continued on next page

Table S1 – *Continued from previous page*

| Molecule | Solvent                 | SSCC         | Method           | vacuum-<br>vacuum | vacuum-<br>solvent | solvent-<br>vacuum | solvent-<br>solvent |
|----------|-------------------------|--------------|------------------|-------------------|--------------------|--------------------|---------------------|
|          |                         | $^3J_{HH}$   | SOPPA            | 7.02              | 7.03               | 7.01               | 7.01                |
|          |                         | <i>vic</i>   | HRPA(D)          | 6.55              | 6.55               | 6.54               | 6.55                |
|          |                         |              | B3LYP            | 7.58              | 7.59               | 7.57               | 7.58                |
|          |                         |              | BHandH           | 7.94              | 7.95               | 7.92               | 7.94                |
|          |                         |              | PBE0             | 7.59              | 7.60               | 7.58               | 7.60                |
|          |                         |              | exp <sup>2</sup> |                   |                    |                    | 6.482               |
|          |                         |              |                  |                   |                    |                    |                     |
|          | Carbon<br>tetrachloride | $^2J_{HH}$   | SOPPA            | -0.23             | -0.19              | -0.13              | -0.10               |
|          |                         |              | HRPA(D)          | 0.08              | 0.12               | 0.16               | 0.20                |
|          |                         |              | B3LYP            | 2.58              | 2.64               | 2.70               | 2.76                |
|          |                         |              | BHandH           | 1.17              | 1.21               | 1.28               | 1.33                |
|          |                         |              | PBE0             | 1.03              | 1.08               | 1.14               | 1.19                |
|          |                         |              | exp <sup>2</sup> |                   |                    |                    | 2.173               |
|          |                         |              |                  |                   |                    |                    |                     |
|          |                         | $^3J_{HH}$   | SOPPA            | 16.96             | 16.96              | 17.04              | 17.04               |
|          |                         | <i>trans</i> | HRPA(D)          | 16.13             | 16.13              | 16.22              | 16.21               |
|          |                         |              | B3LYP            | 18.36             | 18.34              | 18.48              | 18.46               |
|          |                         |              | BHandH           | 17.62             | 17.61              | 17.71              | 17.70               |
|          |                         |              | PBE0             | 18.11             | 18.10              | 18.21              | 18.20               |
|          |                         |              | exp <sup>2</sup> |                   |                    |                    | 16.98               |
|          |                         |              |                  |                   |                    |                    |                     |
|          |                         | $^3J_{HH}$   | SOPPA            | 11.29             | 11.27              | 11.34              | 11.32               |
|          |                         | <i>cis</i>   | HRPA(D)          | 10.74             | 10.72              | 10.80              | 10.77               |
|          |                         |              | B3LYP            | 11.89             | 11.86              | 11.97              | 11.93               |
|          |                         |              | BHandH           | 12.42             | 12.39              | 12.49              | 12.46               |
|          |                         |              | PBE0             | 11.68             | 11.65              | 11.74              | 11.71               |
|          |                         |              | exp <sup>2</sup> |                   |                    |                    | 10.094              |
|          |                         |              |                  |                   |                    |                    |                     |
|          |                         | $^3J_{HH}$   | SOPPA            | 7.02              | 7.02               | 7.00               | 7.01                |

*Continued on next page*

Table S1 – *Continued from previous page*

| Molecule     | Solvent | SSCC                               | Method           | vacuum-<br>vacuum | vacuum-<br>solvent | solvent-<br>vacuum | solvent-<br>solvent |
|--------------|---------|------------------------------------|------------------|-------------------|--------------------|--------------------|---------------------|
|              |         | <i>vic</i>                         | HRPA(D)          | 6.55              | 6.55               | 6.54               | 6.55                |
|              |         |                                    | B3LYP            | 7.58              | 7.58               | 7.58               | 7.58                |
|              |         |                                    | BHandH           | 7.94              | 7.95               | 7.93               | 7.94                |
|              |         |                                    | PBE0             | 7.59              | 7.60               | 7.58               | 7.59                |
|              |         |                                    | exp <sup>2</sup> |                   |                    |                    | 6.459               |
| Acetonitrile | Acetone | <sup>1</sup> <i>J<sub>CC</sub></i> | SOPPA            | 62.69             | 62.03              | 59.29              | 58.65               |
|              |         |                                    | HRPA(D)          | 64.74             | 64.07              | 61.22              | 60.58               |
|              |         |                                    | B3LYP            | 63.37             | 62.75              | 60.94              | 60.33               |
|              |         |                                    | BHandH           | 67.25             | 66.73              | 64.21              | 63.71               |
|              |         |                                    | PBE0             | 59.99             | 59.48              | 57.62              | 57.12               |
|              |         |                                    | exp <sup>3</sup> |                   |                    |                    | 56.94               |
|              |         | <sup>1</sup> <i>J<sub>CH</sub></i> | SOPPA            | 135.78            | 135.89             | 138.07             | 138.16              |
|              |         |                                    | HRPA(D)          | 135.47            | 135.58             | 137.74             | 137.82              |
|              |         |                                    | B3LYP            | 140.57            | 140.68             | 143.02             | 143.10              |
|              |         |                                    | BHandH           | 132.32            | 132.42             | 134.42             | 134.50              |
|              |         |                                    | PBE0             | 131.45            | 131.54             | 133.70             | 133.77              |
|              |         |                                    | exp <sup>3</sup> |                   |                    |                    | 136.25              |
|              |         | <sup>2</sup> <i>J<sub>CH</sub></i> | SOPPA            | -11.73            | -11.91             | -11.33             | -11.51              |
|              |         |                                    | HRPA(D)          | -11.25            | -11.43             | -10.87             | -11.05              |
|              |         |                                    | B3LYP            | -9.62             | -9.84              | -9.23              | -9.45               |
|              |         |                                    | BHandH           | -11.79            | -12.00             | -11.32             | -11.54              |
|              |         |                                    | PBE0             | -10.76            | -10.97             | -10.43             | -10.64              |
|              |         |                                    | exp <sup>3</sup> |                   |                    |                    | -9.94               |
|              |         | <sup>1</sup> <i>J<sub>CN</sub></i> | SOPPA            | -12.49            | -12.62             | -14.28             | -14.40              |
|              |         |                                    | HRPA(D)          | -15.78            | -15.89             | -17.10             | -17.21              |

*Continued on next page*

Table S1 – *Continued from previous page*

| Molecule | Solvent    | SSCC                         | Method           | vacuum-<br>vacuum | vacuum-<br>solvent | solvent-<br>vacuum | solvent-<br>solvent |
|----------|------------|------------------------------|------------------|-------------------|--------------------|--------------------|---------------------|
|          |            |                              | B3LYP            | -19.32            | -19.23             | -21.19             | -21.10              |
|          |            |                              | BHandH           | -28.98            | -28.86             | -30.18             | -30.05              |
|          |            |                              | PBE0             | -18.22            | -18.15             | -19.96             | -19.88              |
|          |            |                              | exp <sup>3</sup> |                   |                    |                    | -17.53              |
|          |            | <sup>3</sup> J <sub>NH</sub> | SOPPA            | -1.66             | -1.66              | -1.71              | -1.71               |
|          |            |                              | HRPA(D)          | -1.45             | -1.45              | -1.50              | -1.50               |
|          |            |                              | B3LYP            | -1.74             | -1.75              | -1.79              | -1.80               |
|          |            |                              | BHandH           | -2.26             | -2.28              | -2.33              | -2.35               |
|          |            |                              | PBE0             | -1.58             | -1.59              | -1.64              | -1.65               |
|          |            |                              | exp <sup>3</sup> |                   |                    |                    | -1.69               |
|          | Chloroform | <sup>1</sup> J <sub>CC</sub> | SOPPA            | 62.69             | 62.14              | 60.01              | 59.47               |
|          |            |                              | HRPA(D)          | 64.74             | 64.18              | 61.96              | 61.42               |
|          |            |                              | B3LYP            | 63.37             | 62.85              | 61.48              | 60.97               |
|          |            |                              | BHandH           | 67.25             | 66.81              | 64.85              | 64.43               |
|          |            |                              | PBE0             | 59.99             | 59.55              | 58.15              | 57.72               |
|          |            |                              | exp <sup>4</sup> |                   |                    |                    | 56.48               |
|          |            | <sup>1</sup> J <sub>CH</sub> | SOPPA            | 135.78            | 135.87             | 137.61             | 137.69              |
|          |            |                              | HRPA(D)          | 135.47            | 135.56             | 137.28             | 137.35              |
|          |            |                              | B3LYP            | 140.57            | 140.66             | 142.51             | 142.59              |
|          |            |                              | BHandH           | 132.32            | 132.40             | 133.99             | 134.06              |
|          |            |                              | PBE0             | 131.45            | 131.54             | 133.24             | 133.31              |
|          |            |                              | exp <sup>4</sup> |                   |                    |                    | 136.1               |
|          |            | <sup>2</sup> J <sub>CH</sub> | SOPPA            | -11.73            | -11.88             | -11.42             | -11.57              |
|          |            |                              | HRPA(D)          | -11.25            | -11.40             | -10.95             | -11.10              |
|          |            |                              | B3LYP            | -9.62             | -9.79              | -9.32              | -9.50               |

*Continued on next page*

Table S1 – *Continued from previous page*

| Molecule      | Solvent                 | SSCC                                                             | Method           | vacuum-<br>vacuum | vacuum-<br>solvent | solvent-<br>vacuum | solvent-<br>solvent |
|---------------|-------------------------|------------------------------------------------------------------|------------------|-------------------|--------------------|--------------------|---------------------|
|               |                         |                                                                  | BHandH           | -11.79            | -11.96             | -11.42             | -11.59              |
|               |                         |                                                                  | PBE0             | -10.76            | -10.93             | -10.50             | -10.67              |
|               |                         |                                                                  | exp <sup>4</sup> |                   |                    |                    | -9.87               |
|               |                         | <sup>1</sup> <i>J<sub>CN</sub></i>                               | SOPPA            | -12.49            | -12.61             | -13.97             | -14.08              |
|               |                         |                                                                  | HRPA(D)          | -15.78            | -15.88             | -16.87             | -16.96              |
|               |                         |                                                                  | B3LYP            | -19.32            | -19.25             | -20.87             | -20.80              |
|               |                         |                                                                  | BHandH           | -28.98            | -28.89             | -29.98             | -29.89              |
|               |                         |                                                                  | PBE0             | -18.22            | -18.17             | -19.66             | -19.60              |
|               |                         |                                                                  | exp <sup>5</sup> |                   |                    |                    | -17.8               |
|               |                         | <sup>2</sup> <i>J<sub>CN</sub></i>                               | SOPPA            | 3.47              | 3.46               | 3.03               | 3.02                |
|               |                         |                                                                  | HRPA(D)          | 2.42              | 2.41               | 2.12               | 2.12                |
|               |                         |                                                                  | B3LYP            | 3.36              | 3.38               | 2.85               | 2.87                |
|               |                         |                                                                  | BHandH           | 2.21              | 2.23               | 1.85               | 1.88                |
|               |                         |                                                                  | PBE0             | 3.22              | 3.23               | 2.74               | 2.76                |
|               |                         |                                                                  | exp <sup>5</sup> |                   |                    |                    | 2.9                 |
| Acrylonitrile | Carbon<br>tetrachloride | <sup>1</sup> <i>J<sub>CH</sub></i><br>( <i>CH</i> )              | SOPPA            | 177.84            | 178.42             | 180.07             | 180.65              |
|               |                         |                                                                  | HRPA(D)          | 176.58            | 177.15             | 178.79             | 179.37              |
|               |                         |                                                                  | B3LYP            | 179.40            | 180.07             | 181.82             | 182.50              |
|               |                         |                                                                  | BHandH           | 170.57            | 171.25             | 172.69             | 173.39              |
|               |                         |                                                                  | PBE0             | 169.75            | 170.42             | 172.00             | 172.68              |
|               |                         |                                                                  | exp <sup>6</sup> |                   |                    |                    | 178.3               |
|               |                         | <sup>1</sup> <i>J<sub>CH</sub></i><br>( <i>CH</i> <sub>2</sub> ) | SOPPA            | 167.57            | 167.59             | 168.43             | 168.45              |
|               |                         |                                                                  | HRPA(D)          | 166.71            | 166.73             | 167.60             | 167.62              |
|               |                         |                                                                  | B3LYP            | 172.29            | 172.33             | 173.15             | 173.20              |
|               |                         |                                                                  | BHandH           | 163.28            | 163.33             | 164.02             | 164.07              |

*Continued on next page*

Table S1 – *Continued from previous page*

| Molecule | Solvent    | SSCC                     | Method           | vacuum-<br>vacuum | vacuum-<br>solvent | solvent-<br>vacuum | solvent-<br>solvent |
|----------|------------|--------------------------|------------------|-------------------|--------------------|--------------------|---------------------|
|          | Chloroform | $^1J_{CH}$<br>( $CH$ )   | PBE0             | 162.30            | 162.35             | 163.14             | 163.19              |
|          |            |                          | exp <sup>6</sup> |                   |                    |                    | 166.0               |
|          |            |                          | SOPPA            | 177.84            | 178.69             | 181.19             | 182.06              |
|          |            |                          | HRPA(D)          | 176.58            | 177.42             | 179.90             | 180.77              |
|          |            |                          | B3LYP            | 179.40            | 180.39             | 183.07             | 184.08              |
|          |            |                          | BHandH           | 170.57            | 171.58             | 173.78             | 174.81              |
|          |            |                          | PBE0             | 169.75            | 170.73             | 173.16             | 174.17              |
|          |            |                          | exp <sup>6</sup> |                   |                    |                    | 179.0               |
|          |            | $^1J_{CH}$<br>( $CH_2$ ) | SOPPA            | 167.57            | 167.59             | 168.95             | 168.96              |
|          |            |                          | HRPA(D)          | 166.71            | 166.74             | 168.13             | 168.14              |
|          |            |                          | B3LYP            | 172.29            | 172.36             | 173.67             | 173.73              |
|          |            |                          | BHandH           | 163.28            | 163.36             | 164.46             | 164.54              |
|          |            |                          | PBE0             | 162.30            | 162.38             | 163.64             | 163.70              |
|          |            |                          | exp <sup>6</sup> |                   |                    |                    | 166.5               |
|          | THF        | $^1J_{CH}$<br>( $CH$ )   | SOPPA            | 177.84            | 178.79             | 181.54             | 182.50              |
|          |            |                          | HRPA(D)          | 176.58            | 177.52             | 180.25             | 181.22              |
|          |            |                          | B3LYP            | 179.40            | 180.50             | 183.46             | 184.59              |
|          |            |                          | BHandH           | 170.57            | 171.69             | 174.11             | 175.26              |
|          |            |                          | PBE0             | 169.75            | 170.84             | 173.53             | 174.64              |
|          |            |                          | exp <sup>6</sup> |                   |                    |                    | 179.7               |
|          |            | $^1J_{CH}$<br>( $CH_2$ ) | SOPPA            | 167.57            | 167.59             | 169.12             | 169.13              |
|          |            |                          | HRPA(D)          | 166.71            | 166.74             | 168.30             | 168.31              |
|          |            |                          | B3LYP            | 172.29            | 172.36             | 173.84             | 173.91              |
|          |            |                          | BHandH           | 163.28            | 163.37             | 164.61             | 164.69              |
|          |            |                          | PBE0             | 162.30            | 162.39             | 163.80             | 163.87              |

*Continued on next page*

Table S1 – *Continued from previous page*

| Molecule | Solvent                      | SSCC | Method                       | vacuum-<br>vacuum | vacuum-<br>solvent | solvent-<br>vacuum | solvent-<br>solvent |        |
|----------|------------------------------|------|------------------------------|-------------------|--------------------|--------------------|---------------------|--------|
|          | 3-Pentanone                  |      | exp <sup>6</sup>             |                   |                    |                    | 165.5               |        |
|          |                              |      | <sup>1</sup> J <sub>CH</sub> | SOPPA             | 177.84             | 178.88             | 181.90              | 182.96 |
|          |                              |      | (CH)                         | HRPA(D)           | 176.58             | 177.61             | 180.61              | 181.67 |
|          |                              |      |                              | B3LYP             | 179.40             | 180.60             | 183.87              | 185.11 |
|          |                              |      |                              | BHandH            | 170.57             | 171.80             | 174.46              | 175.73 |
|          |                              |      |                              | PBE0              | 169.75             | 170.95             | 173.90              | 175.13 |
|          |                              |      | exp <sup>6</sup>             |                   |                    |                    |                     | 179.2  |
|          |                              |      | <sup>1</sup> J <sub>CH</sub> | SOPPA             | 167.57             | 167.59             | 169.30              | 169.31 |
|          |                              |      | (CH <sub>2</sub> )           | HRPA(D)           | 166.71             | 166.74             | 168.48              | 168.49 |
|          |                              |      |                              | B3LYP             | 172.29             | 172.37             | 174.03              | 174.09 |
|          |                              |      |                              | BHandH            | 163.28             | 163.37             | 164.77              | 164.85 |
|          |                              |      |                              | PBE0              | 162.30             | 162.39             | 163.98              | 164.05 |
|          |                              | DMSO |                              | exp <sup>6</sup>  |                    |                    |                     |        |
|          | <sup>1</sup> J <sub>CH</sub> |      |                              | SOPPA             | 177.84             | 178.93             | 182.09              | 183.20 |
|          | (CH)                         |      |                              | HRPA(D)           | 176.58             | 177.66             | 180.80              | 181.91 |
|          |                              |      |                              | B3LYP             | 179.40             | 180.66             | 184.09              | 185.39 |
|          |                              |      |                              | BHandH            | 170.57             | 171.86             | 174.65              | 175.98 |
|          |                              |      |                              | PBE0              | 169.75             | 171.00             | 174.11              | 175.40 |
|          |                              |      | exp <sup>6</sup>             |                   |                    |                    |                     | 180.9  |
|          |                              |      | <sup>1</sup> J <sub>CH</sub> | SOPPA             | 167.57             | 167.59             | 169.40              | 169.40 |
|          |                              |      | (CH <sub>2</sub> )           | HRPA(D)           | 166.71             | 166.74             | 168.59              | 168.59 |
|          |                              |      |                              | B3LYP             | 172.29             | 172.37             | 174.13              | 174.20 |
|          |                              |      |                              | BHandH            | 163.28             | 163.38             | 164.86              | 164.94 |
|          |                              |      |                              | PBE0              | 162.30             | 162.40             | 164.07              | 164.16 |
|          |                              |      | exp <sup>6</sup>             |                   |                    |                    | 165.8               |        |

*Continued on next page*



Table S1 – *Continued from previous page*

| Molecule     | Solvent     | SSCC       | Method           | vacuum-<br>vacuum | vacuum-<br>solvent | solvent-<br>vacuum | solvent-<br>solvent |
|--------------|-------------|------------|------------------|-------------------|--------------------|--------------------|---------------------|
| Acetaldehyde | Cyclohexane | $^1J_{CH}$ | SOPPA            | 172.83            | 172.73             | 175.17             | 175.08              |
|              |             | ( $CH$ )   | HRPA(D)          | 172.85            | 172.74             | 175.16             | 175.06              |
|              |             |            | B3LYP            | 176.66            | 176.66             | 178.67             | 178.69              |
|              |             |            | BHandH           | 166.51            | 166.57             | 168.47             | 168.55              |
|              |             |            | PBE0             | 165.25            | 165.25             | 167.18             | 167.20              |
|              |             |            | exp <sup>7</sup> |                   |                    |                    | 170.98              |
|              |             | $^1J_{CH}$ | SOPPA            | 128.12            | 128.01             | 128.56             | 128.44              |
|              |             | ( $CH_3$ ) | HRPA(D)          | 128.04            | 127.93             | 128.47             | 128.35              |
|              |             |            | B3LYP            | 133.36            | 133.25             | 133.82             | 133.71              |
|              |             |            | BHandH           | 125.15            | 125.07             | 125.53             | 125.45              |
|              |             |            | PBE0             | 124.25            | 124.17             | 124.66             | 124.58              |
|              |             |            | exp <sup>7</sup> |                   |                    |                    | 126.88              |
|              | Chloroform  | $^1J_{CH}$ | SOPPA            | 172.83            | 172.70             | 176.79             | 176.68              |
|              |             | ( $CH$ )   | HRPA(D)          | 172.85            | 172.71             | 176.76             | 176.64              |
|              |             |            | B3LYP            | 176.66            | 176.67             | 180.09             | 180.15              |
|              |             |            | BHandH           | 166.51            | 166.59             | 169.84             | 169.96              |
|              |             |            | PBE0             | 165.25            | 165.28             | 168.53             | 168.60              |
|              |             |            | exp <sup>7</sup> |                   |                    |                    | 172.12              |
|              |             | $^1J_{CH}$ | SOPPA            | 128.12            | 127.95             | 128.86             | 128.70              |
|              |             | ( $CH_3$ ) | HRPA(D)          | 128.04            | 127.87             | 128.77             | 128.60              |
|              |             |            | B3LYP            | 133.36            | 133.17             | 134.15             | 133.97              |
|              |             |            | BHandH           | 125.15            | 125.01             | 125.81             | 125.66              |
|              |             |            | PBE0             | 124.25            | 124.10             | 124.96             | 124.82              |
|              |             |            | exp <sup>7</sup> |                   |                    |                    | 127.26              |
|              | Acetone     | $^1J_{CH}$ | SOPPA            | 172.83            | 172.68             | 177.76             | 177.64              |

*Continued on next page*

Table S1 – *Continued from previous page*

| Molecule | Solvent | SSCC                         | Method           | vacuum-<br>vacuum | vacuum-<br>solvent | solvent-<br>vacuum | solvent-<br>solvent |
|----------|---------|------------------------------|------------------|-------------------|--------------------|--------------------|---------------------|
|          |         | (CH)                         | HRPA(D)          | 172.85            | 172.70             | 177.71             | 177.59              |
|          |         |                              | B3LYP            | 176.66            | 176.68             | 180.95             | 181.05              |
|          |         |                              | BHandH           | 166.51            | 166.61             | 170.66             | 170.83              |
|          |         |                              | PBE0             | 165.25            | 165.30             | 169.35             | 169.46              |
|          |         |                              | exp <sup>7</sup> |                   |                    |                    | 172.58              |
|          |         | <sup>1</sup> J <sub>CH</sub> | SOPPA            | 128.12            | 127.91             | 129.05             | 128.85              |
|          |         | (CH <sub>3</sub> )           | HRPA(D)          | 128.04            | 127.83             | 128.96             | 128.75              |
|          |         |                              | B3LYP            | 133.36            | 133.12             | 134.35             | 134.13              |
|          |         |                              | BHandH           | 125.15            | 124.96             | 125.97             | 125.79              |
|          |         |                              | PBE0             | 124.25            | 124.06             | 125.15             | 124.96              |
|          |         |                              | exp <sup>7</sup> |                   |                    |                    | 127.10              |
|          | DMSO    | <sup>1</sup> J <sub>CH</sub> | SOPPA            | 172.83            | 172.68             | 177.93             | 177.82              |
|          |         | (CH)                         | HRPA(D)          | 172.85            | 172.69             | 177.88             | 177.77              |
|          |         |                              | B3LYP            | 176.66            | 176.69             | 181.11             | 181.21              |
|          |         |                              | BHandH           | 166.51            | 166.62             | 170.81             | 170.99              |
|          |         |                              | PBE0             | 165.25            | 165.31             | 169.49             | 169.62              |
|          |         |                              | exp <sup>7</sup> |                   |                    |                    | 173.43              |
|          |         | <sup>1</sup> J <sub>CH</sub> | SOPPA            | 128.12            | 127.91             | 129.08             | 128.87              |
|          |         | (CH <sub>3</sub> )           | HRPA(D)          | 128.04            | 127.83             | 128.99             | 128.77              |
|          |         |                              | B3LYP            | 133.36            | 133.11             | 134.39             | 134.15              |
|          |         |                              | BHandH           | 125.15            | 124.95             | 126.01             | 125.82              |
|          |         |                              | PBE0             | 124.25            | 124.05             | 125.18             | 124.99              |
|          |         |                              | exp <sup>7</sup> |                   |                    |                    | 127.11              |
| Benzene  | Acetone | <sup>1</sup> J <sub>CH</sub> | SOPPA            | 162.12            | 162.36             | 163.59             | 163.84              |
|          |         |                              | HRPA(D)          | 161.59            | 161.83             | 163.06             | 163.30              |

*Continued on next page*

Table S1 – *Continued from previous page*

| Molecule                | Solvent  | SSCC                               | Method           | vacuum-<br>vacuum | vacuum-<br>solvent | solvent-<br>vacuum | solvent-<br>solvent |
|-------------------------|----------|------------------------------------|------------------|-------------------|--------------------|--------------------|---------------------|
| Carbon<br>tetrachloride |          |                                    | B3LYP            | 166.07            | 166.32             | 167.48             | 167.74              |
|                         |          |                                    | BHandH           | 156.03            | 156.31             | 157.41             | 157.70              |
|                         |          |                                    | PBE0             | 156.12            | 156.38             | 157.54             | 157.80              |
|                         |          |                                    | exp <sup>8</sup> |                   |                    |                    | 158.8               |
|                         |          |                                    | SOPPA            | 162.12            | 162.25             | 162.93             | 163.07              |
|                         |          |                                    | HRPA(D)          | 161.59            | 161.72             | 162.41             | 162.54              |
|                         |          |                                    | B3LYP            | 166.07            | 166.20             | 166.84             | 166.98              |
|                         |          |                                    | BHandH           | 156.03            | 156.19             | 156.79             | 156.95              |
|                         |          |                                    | PBE0             | 156.12            | 156.27             | 156.90             | 157.05              |
|                         |          |                                    | exp <sup>8</sup> |                   |                    |                    | 158.2               |
|                         |          |                                    | SOPPA            | -1.06             | -1.06              | -0.78              | -0.76               |
|                         |          |                                    | HRPA(D)          | -0.52             | -0.52              | -0.32              | -0.30               |
|                         |          |                                    | B3LYP            | 0.22              | 0.23               | 0.54               | 0.57                |
|                         |          |                                    | BHandH           | -1.11             | -1.11              | -0.83              | -0.82               |
| Fluoro-<br>benzene      | Methanol | <sup>5</sup> <i>J<sub>FH</sub></i> | PBE0             | -0.33             | -0.33              | -0.03              | -0.02               |
|                         |          |                                    | exp <sup>9</sup> |                   |                    |                    | 0.364               |
|                         |          |                                    | SOPPA            | 5.06              | 5.10               | 5.40               | 5.45                |
|                         |          |                                    | HRPA(D)          | 4.42              | 4.46               | 4.71               | 4.76                |
|                         |          |                                    | B3LYP            | 5.49              | 5.53               | 5.94               | 6.01                |
|                         |          |                                    | BHandH           | 5.37              | 5.41               | 5.64               | 5.70                |
|                         |          | <sup>4</sup> <i>J<sub>FH</sub></i> | PBE0             | 5.58              | 5.62               | 5.96               | 6.02                |
|                         |          |                                    | exp <sup>9</sup> |                   |                    |                    | 5.765               |
|                         |          |                                    | SOPPA            | 6.01              | 5.96               | 7.18               | 7.17                |
|                         |          |                                    | HRPA(D)          | 5.99              | 5.94               | 6.98               | 6.96                |
|                         |          |                                    | B3LYP            | 9.30              | 9.21               | 10.72              | 10.68               |

*Continued on next page*

Table S1 – *Continued from previous page*

| Molecule | Solvent | SSCC                                      | Method           | vacuum-<br>vacuum | vacuum-<br>solvent | solvent-<br>vacuum | solvent-<br>solvent |
|----------|---------|-------------------------------------------|------------------|-------------------|--------------------|--------------------|---------------------|
|          |         |                                           | BHandH           | 10.61             | 10.54              | 11.89              | 11.86               |
|          |         |                                           | PBE0             | 7.75              | 7.67               | 8.99               | 8.95                |
|          |         |                                           | exp <sup>9</sup> |                   |                    |                    | 9.276               |
|          |         | <sup>3</sup> J <sub>HH</sub><br>(34 + 45) | SOPPA            | 8.05              | 8.02               | 8.09               | 8.06                |
|          |         |                                           | HRPA(D)          | 7.62              | 7.59               | 7.66               | 7.63                |
|          |         |                                           | B3LYP            | 8.74              | 8.71               | 8.80               | 8.76                |
|          |         |                                           | BHandH           | 9.46              | 9.42               | 9.52               | 9.48                |
|          |         |                                           | PBE0             | 8.55              | 8.51               | 8.61               | 8.57                |
|          |         |                                           | exp <sup>9</sup> |                   |                    |                    | 7.452               |
|          |         | <sup>3</sup> J <sub>HH</sub><br>(23 + 56) | SOPPA            | 8.84              | 8.80               | 8.95               | 8.91                |
|          |         |                                           | HRPA(D)          | 8.33              | 8.29               | 8.43               | 8.39                |
|          |         |                                           | B3LYP            | 9.80              | 9.75               | 9.94               | 9.90                |
|          |         |                                           | BHandH           | 10.41             | 10.36              | 10.54              | 10.49               |
|          |         |                                           | PBE0             | 9.59              | 9.54               | 9.73               | 9.68                |
|          |         |                                           | exp <sup>9</sup> |                   |                    |                    | 8.371               |
|          |         | <sup>4</sup> J <sub>HH</sub><br>(24 + 46) | SOPPA            | 0.65              | 0.65               | 0.63               | 0.63                |
|          |         |                                           | HRPA(D)          | 0.68              | 0.68               | 0.66               | 0.66                |
|          |         |                                           | B3LYP            | 0.95              | 0.94               | 0.92               | 0.91                |
|          |         |                                           | BHandH           | 0.53              | 0.53               | 0.51               | 0.51                |
|          |         |                                           | PBE0             | 0.77              | 0.76               | 0.75               | 0.74                |
|          |         |                                           | exp <sup>9</sup> |                   |                    |                    | 1.051               |
|          |         | <sup>4</sup> J <sub>HH</sub><br>(35)      | SOPPA            | 1.27              | 1.26               | 1.30               | 1.29                |
|          |         |                                           | HRPA(D)          | 1.20              | 1.19               | 1.23               | 1.22                |
|          |         |                                           | B3LYP            | 1.67              | 1.66               | 1.71               | 1.70                |
|          |         |                                           | BHandH           | 1.12              | 1.11               | 1.15               | 1.14                |

*Continued on next page*

Table S1 – *Continued from previous page*

| Molecule | Solvent | SSCC                         | Method                       | vacuum-<br>vacuum | vacuum-<br>solvent | solvent-<br>vacuum | solvent-<br>solvent |
|----------|---------|------------------------------|------------------------------|-------------------|--------------------|--------------------|---------------------|
|          |         |                              | PBE0                         | 1.50              | 1.50               | 1.54               | 1.54                |
|          |         |                              | exp <sup>9</sup>             |                   |                    |                    | 1.812               |
|          |         |                              | <sup>4</sup> J <sub>HH</sub> |                   |                    |                    |                     |
|          |         |                              | SOPPA                        | 2.21              | 2.20               | 2.32               | 2.32                |
|          |         |                              | (26)                         |                   |                    |                    |                     |
|          |         |                              | HRPA(D)                      | 2.02              | 2.01               | 2.12               | 2.11                |
|          |         |                              | B3LYP                        | 2.90              | 2.89               | 3.03               | 3.04                |
|          |         |                              | BHandH                       | 2.45              | 2.44               | 2.57               | 2.57                |
|          |         |                              | PBE0                         | 2.66              | 2.66               | 2.79               | 2.79                |
|          |         |                              | exp <sup>9</sup>             |                   |                    |                    | 2.779               |
|          |         |                              | <sup>5</sup> J <sub>HH</sub> |                   |                    |                    |                     |
|          |         |                              | SOPPA                        | 0.90              | 0.91               | 0.89               | 0.89                |
|          |         |                              | HRPA(D)                      | 0.65              | 0.65               | 0.64               | 0.64                |
|          |         |                              | B3LYP                        | 0.51              | 0.51               | 0.50               | 0.50                |
|          |         |                              | BHandH                       | 0.77              | 0.78               | 0.75               | 0.76                |
|          |         |                              | PBE0                         | 0.70              | 0.71               | 0.69               | 0.70                |
|          |         |                              | exp <sup>9</sup>             |                   |                    |                    | 0.417               |
| Ethanol  |         | <sup>5</sup> J <sub>FH</sub> | SOPPA                        | -1.06             | -1.06              | -0.78              | -0.77               |
|          |         |                              | HRPA(D)                      | -0.52             | -0.52              | -0.32              | -0.31               |
|          |         |                              | B3LYP                        | 0.22              | 0.23               | 0.54               | 0.56                |
|          |         |                              | BHandH                       | -1.11             | -1.11              | -0.83              | -0.82               |
|          |         |                              | PBE0                         | -0.33             | -0.33              | -0.03              | -0.02               |
|          |         |                              | exp <sup>9</sup>             |                   |                    |                    | 0.331               |
|          |         |                              | <sup>4</sup> J <sub>FH</sub> |                   |                    |                    |                     |
|          |         |                              | SOPPA                        | 5.06              | 5.10               | 5.39               | 5.45                |
|          |         |                              | HRPA(D)                      | 4.42              | 4.46               | 4.71               | 4.75                |
|          |         |                              | B3LYP                        | 5.49              | 5.53               | 5.93               | 6.00                |
|          |         |                              | BHandH                       | 5.37              | 5.41               | 5.63               | 5.69                |
|          |         |                              | PBE0                         | 5.58              | 5.62               | 5.95               | 6.01                |

*Continued on next page*

Table S1 – *Continued from previous page*

| Molecule | Solvent | SSCC | Method                       | vacuum-<br>vacuum | vacuum-<br>solvent | solvent-<br>vacuum | solvent-<br>solvent |       |
|----------|---------|------|------------------------------|-------------------|--------------------|--------------------|---------------------|-------|
|          |         |      | exp <sup>9</sup>             |                   |                    |                    | 5.729               |       |
|          |         |      | <sup>3</sup> J <sub>FH</sub> | SOPPA             | 6.01               | 5.96               | 7.17                | 7.15  |
|          |         |      |                              | HRPA(D)           | 5.99               | 5.94               | 6.97                | 6.95  |
|          |         |      |                              | B3LYP             | 9.30               | 9.21               | 10.70               | 10.66 |
|          |         |      |                              | BHandH            | 10.61              | 10.54              | 11.87               | 11.84 |
|          |         |      |                              | PBE0              | 7.75               | 7.67               | 8.97                | 8.94  |
|          |         |      |                              | exp <sup>9</sup>  |                    |                    |                     | 9.165 |
|          |         |      | <sup>3</sup> J <sub>HH</sub> | SOPPA             | 8.05               | 8.02               | 8.09                | 8.06  |
|          |         |      | (34 + 45)                    | HRPA(D)           | 7.62               | 7.59               | 7.66                | 7.63  |
|          |         |      |                              | B3LYP             | 8.74               | 8.71               | 8.80                | 8.76  |
|          |         |      |                              | BHandH            | 9.46               | 9.42               | 9.51                | 9.48  |
|          |         |      |                              | PBE0              | 8.55               | 8.51               | 8.61                | 8.57  |
|          |         |      |                              | exp <sup>9</sup>  |                    |                    |                     | 7.454 |
|          |         |      | <sup>3</sup> J <sub>HH</sub> | SOPPA             | 8.84               | 8.80               | 8.95                | 8.91  |
|          |         |      | (23 + 56)                    | HRPA(D)           | 8.33               | 8.29               | 8.43                | 8.39  |
|          |         |      |                              | B3LYP             | 9.80               | 9.75               | 9.94                | 9.89  |
|          |         |      |                              | BHandH            | 10.41              | 10.36              | 10.53               | 10.49 |
|          |         |      |                              | PBE0              | 9.59               | 9.54               | 9.72                | 9.68  |
|          |         |      |                              | exp <sup>9</sup>  |                    |                    |                     | 8.350 |
|          |         |      | <sup>4</sup> J <sub>HH</sub> | SOPPA             | 0.65               | 0.65               | 0.63                | 0.63  |
|          |         |      | (24 + 46)                    | HRPA(D)           | 0.68               | 0.68               | 0.66                | 0.66  |
|          |         |      |                              | B3LYP             | 0.95               | 0.94               | 0.92                | 0.91  |
|          |         |      |                              | BHandH            | 0.53               | 0.53               | 0.51                | 0.51  |
|          |         |      |                              | PBE0              | 0.77               | 0.76               | 0.75                | 0.74  |
|          |         |      |                              | exp <sup>9</sup>  |                    |                    |                     | 1.053 |

*Continued on next page*

Table S1 – *Continued from previous page*

| Molecule | Solvent    | SSCC       | Method           | vacuum-<br>vacuum | vacuum-<br>solvent | solvent-<br>vacuum | solvent-<br>solvent |
|----------|------------|------------|------------------|-------------------|--------------------|--------------------|---------------------|
|          |            | $^4J_{HH}$ | SOPPA            | 1.27              | 1.26               | 1.30               | 1.29                |
|          |            | (35)       | HRPA(D)          | 1.20              | 1.19               | 1.23               | 1.22                |
|          |            |            | B3LYP            | 1.67              | 1.66               | 1.71               | 1.70                |
|          |            |            | BHandH           | 1.12              | 1.11               | 1.15               | 1.14                |
|          |            |            | PBE0             | 1.50              | 1.50               | 1.54               | 1.54                |
|          |            |            | exp <sup>9</sup> |                   |                    |                    | 1.783               |
|          |            | $^4J_{HH}$ | SOPPA            | 2.21              | 2.20               | 2.32               | 2.31                |
|          |            | (26)       | HRPA(D)          | 2.02              | 2.01               | 2.12               | 2.11                |
|          |            |            | B3LYP            | 2.90              | 2.89               | 3.03               | 3.04                |
|          |            |            | BHandH           | 2.45              | 2.44               | 2.57               | 2.57                |
|          |            |            | PBE0             | 2.66              | 2.66               | 2.79               | 2.79                |
|          |            |            | exp <sup>9</sup> |                   |                    |                    | 2.761               |
|          |            | $^5J_{HH}$ | SOPPA            | 0.90              | 0.91               | 0.89               | 0.89                |
|          |            |            | HRPA(D)          | 0.65              | 0.65               | 0.64               | 0.64                |
|          |            |            | B3LYP            | 0.51              | 0.51               | 0.50               | 0.50                |
|          |            |            | BHandH           | 0.77              | 0.78               | 0.75               | 0.76                |
|          |            |            | PBE0             | 0.70              | 0.71               | 0.69               | 0.70                |
|          |            |            | exp <sup>9</sup> |                   |                    |                    | 0.427               |
|          | Chloroform | $^5J_{FH}$ | SOPPA            | -1.06             | -1.06              | -0.84              | -0.83               |
|          |            |            | HRPA(D)          | -0.52             | -0.52              | -0.36              | -0.35               |
|          |            |            | B3LYP            | 0.22              | 0.22               | 0.47               | 0.49                |
|          |            |            | BHandH           | -1.11             | -1.11              | -0.89              | -0.88               |
|          |            |            | PBE0             | -0.33             | -0.33              | -0.09              | -0.08               |
|          |            |            | exp <sup>9</sup> |                   |                    |                    | 0.325               |
|          |            | $^4J_{FH}$ | SOPPA            | 5.06              | 5.09               | 5.33               | 5.36                |

*Continued on next page*

Table S1 – *Continued from previous page*

| Molecule | Solvent | SSCC | Method                       | vacuum-<br>vacuum | vacuum-<br>solvent | solvent-<br>vacuum | solvent-<br>solvent |
|----------|---------|------|------------------------------|-------------------|--------------------|--------------------|---------------------|
|          |         |      | HRPA(D)                      | 4.42              | 4.45               | 4.65               | 4.68                |
|          |         |      | B3LYP                        | 5.49              | 5.52               | 5.84               | 5.89                |
|          |         |      | BHandH                       | 5.37              | 5.40               | 5.58               | 5.62                |
|          |         |      | PBE0                         | 5.58              | 5.61               | 5.88               | 5.92                |
|          |         |      | exp <sup>9</sup>             |                   |                    |                    | 5.742               |
|          |         |      | <sup>3</sup> J <sub>FH</sub> |                   |                    |                    |                     |
|          |         |      | SOPPA                        | 6.01              | 5.97               | 6.94               | 6.93                |
|          |         |      | HRPA(D)                      | 5.99              | 5.95               | 6.78               | 6.76                |
|          |         |      | B3LYP                        | 9.30              | 9.23               | 10.43              | 10.39               |
|          |         |      | BHandH                       | 10.61             | 10.56              | 11.63              | 11.60               |
|          |         |      | PBE0                         | 7.75              | 7.69               | 8.73               | 8.70                |
|          |         |      | exp <sup>9</sup>             |                   |                    |                    | 9.114               |
|          |         |      | <sup>3</sup> J <sub>HH</sub> |                   |                    |                    |                     |
|          |         |      | SOPPA                        | 8.05              | 8.02               | 8.08               | 8.05                |
|          |         |      | (34 + 45) HRPA(D)            | 7.62              | 7.59               | 7.65               | 7.63                |
|          |         |      | B3LYP                        | 8.74              | 8.71               | 8.79               | 8.76                |
|          |         |      | BHandH                       | 9.46              | 9.43               | 9.50               | 9.47                |
|          |         |      | PBE0                         | 8.55              | 8.52               | 8.59               | 8.56                |
|          |         |      | exp <sup>9</sup>             |                   |                    |                    | 7.442               |
|          |         |      | <sup>3</sup> J <sub>HH</sub> |                   |                    |                    |                     |
|          |         |      | SOPPA                        | 8.84              | 8.81               | 8.93               | 8.90                |
|          |         |      | (23 + 56) HRPA(D)            | 8.33              | 8.30               | 8.41               | 8.38                |
|          |         |      | B3LYP                        | 9.80              | 9.76               | 9.91               | 9.88                |
|          |         |      | BHandH                       | 10.41             | 10.37              | 10.51              | 10.47               |
|          |         |      | PBE0                         | 9.59              | 9.55               | 9.70               | 9.66                |
|          |         |      | exp <sup>9</sup>             |                   |                    |                    | 8.362               |
|          |         |      | <sup>4</sup> J <sub>HH</sub> |                   |                    |                    |                     |
|          |         |      | SOPPA                        | 0.65              | 0.65               | 0.64               | 0.63                |
|          |         |      | (24 + 46) HRPA(D)            | 0.68              | 0.68               | 0.67               | 0.66                |

*Continued on next page*



Table S1 – *Continued from previous page*

| Molecule | Solvent | SSCC                                 | Method           | vacuum-<br>vacuum | vacuum-<br>solvent | solvent-<br>vacuum | solvent-<br>solvent |
|----------|---------|--------------------------------------|------------------|-------------------|--------------------|--------------------|---------------------|
|          |         |                                      | B3LYP            | 0.95              | 0.94               | 0.93               | 0.92                |
|          |         |                                      | BHandH           | 0.53              | 0.53               | 0.52               | 0.51                |
|          |         |                                      | PBE0             | 0.77              | 0.76               | 0.75               | 0.75                |
|          |         |                                      | exp <sup>9</sup> |                   |                    |                    | 1.068               |
|          |         | <sup>4</sup> J <sub>HH</sub><br>(35) | SOPPA            | 1.27              | 1.26               | 1.29               | 1.29                |
|          |         |                                      | HRPA(D)          | 1.20              | 1.19               | 1.22               | 1.22                |
|          |         |                                      | B3LYP            | 1.67              | 1.66               | 1.70               | 1.70                |
|          |         |                                      | BHandH           | 1.12              | 1.11               | 1.15               | 1.14                |
|          |         |                                      | PBE0             | 1.50              | 1.50               | 1.54               | 1.53                |
|          |         |                                      | exp <sup>9</sup> |                   |                    |                    | 1.807               |
|          |         | <sup>4</sup> J <sub>HH</sub><br>(26) | SOPPA            | 2.21              | 2.20               | 2.30               | 2.29                |
|          |         |                                      | HRPA(D)          | 2.02              | 2.01               | 2.10               | 2.09                |
|          |         |                                      | B3LYP            | 2.90              | 2.89               | 3.01               | 3.01                |
|          |         |                                      | BHandH           | 2.45              | 2.45               | 2.55               | 2.55                |
|          |         |                                      | PBE0             | 2.66              | 2.66               | 2.76               | 2.76                |
|          |         |                                      | exp <sup>9</sup> |                   |                    |                    | 2.807               |
|          |         | <sup>5</sup> J <sub>HH</sub>         | SOPPA            | 0.90              | 0.91               | 0.89               | 0.89                |
|          |         |                                      | HRPA(D)          | 0.65              | 0.65               | 0.64               | 0.64                |
|          |         |                                      | B3LYP            | 0.51              | 0.51               | 0.50               | 0.50                |
|          |         |                                      | BHandH           | 0.77              | 0.78               | 0.76               | 0.76                |
|          |         |                                      | PBE0             | 0.70              | 0.71               | 0.69               | 0.70                |
|          |         |                                      | exp <sup>9</sup> |                   |                    |                    | 0.403               |
|          | Acetone | <sup>5</sup> J <sub>FH</sub>         | SOPPA            | -1.06             | -1.06              | -0.78              | -0.77               |
|          |         |                                      | HRPA(D)          | -0.52             | -0.52              | -0.32              | -0.31               |
|          |         |                                      | B3LYP            | 0.22              | 0.23               | 0.53               | 0.56                |

*Continued on next page*

Table S1 – *Continued from previous page*

| Molecule | Solvent | SSCC                                      | Method           | vacuum-<br>vacuum | vacuum-<br>solvent | solvent-<br>vacuum | solvent-<br>solvent |
|----------|---------|-------------------------------------------|------------------|-------------------|--------------------|--------------------|---------------------|
|          |         |                                           | BHandH           | -1.11             | -1.11              | -0.84              | -0.82               |
|          |         |                                           | PBE0             | -0.33             | -0.33              | -0.04              | -0.02               |
|          |         |                                           | exp <sup>9</sup> |                   |                    |                    | 0.385               |
|          |         | <sup>4</sup> J <sub>FH</sub>              | SOPPA            | 5.06              | 5.10               | 5.39               | 5.44                |
|          |         |                                           | HRPA(D)          | 4.42              | 4.46               | 4.71               | 4.75                |
|          |         |                                           | B3LYP            | 5.49              | 5.53               | 5.93               | 6.00                |
|          |         |                                           | BHandH           | 5.37              | 5.41               | 5.63               | 5.69                |
|          |         |                                           | PBE0             | 5.58              | 5.62               | 5.95               | 6.01                |
|          |         |                                           | exp <sup>9</sup> |                   |                    |                    | 5.815               |
|          |         | <sup>3</sup> J <sub>FH</sub>              | SOPPA            | 6.01              | 5.96               | 7.16               | 7.14                |
|          |         |                                           | HRPA(D)          | 5.99              | 5.94               | 6.96               | 6.94                |
|          |         |                                           | B3LYP            | 9.30              | 9.21               | 10.69              | 10.65               |
|          |         |                                           | BHandH           | 10.61             | 10.54              | 11.86              | 11.83               |
|          |         |                                           | PBE0             | 7.75              | 7.67               | 8.96               | 8.93                |
|          |         |                                           | exp <sup>9</sup> |                   |                    |                    | 9.338               |
|          |         | <sup>3</sup> J <sub>HH</sub><br>(34 + 45) | SOPPA            | 8.05              | 8.02               | 8.09               | 8.06                |
|          |         |                                           | HRPA(D)          | 7.62              | 7.59               | 7.66               | 7.63                |
|          |         |                                           | B3LYP            | 8.74              | 8.71               | 8.80               | 8.76                |
|          |         |                                           | BHandH           | 9.46              | 9.42               | 9.51               | 9.48                |
|          |         |                                           | PBE0             | 8.55              | 8.51               | 8.61               | 8.57                |
|          |         |                                           | exp <sup>9</sup> |                   |                    |                    | 7.447               |
|          |         | <sup>3</sup> J <sub>HH</sub><br>(23 + 56) | SOPPA            | 8.84              | 8.80               | 8.95               | 8.91                |
|          |         |                                           | HRPA(D)          | 8.33              | 8.29               | 8.43               | 8.39                |
|          |         |                                           | B3LYP            | 9.80              | 9.75               | 9.94               | 9.89                |
|          |         |                                           | BHandH           | 10.41             | 10.36              | 10.53              | 10.49               |

*Continued on next page*

Table S1 – *Continued from previous page*

| Molecule | Solvent | SSCC                         | Method           | vacuum- | vacuum- | solvent- | solvent- |
|----------|---------|------------------------------|------------------|---------|---------|----------|----------|
|          |         |                              |                  | vacuum  | solvent | vacuum   | solvent  |
|          |         |                              | PBE0             | 9.59    | 9.54    | 9.72     | 9.68     |
|          |         |                              | exp <sup>9</sup> |         |         |          | 8.368    |
|          |         | <sup>4</sup> J <sub>HH</sub> | SOPPA            | 0.65    | 0.65    | 0.63     | 0.63     |
|          |         | (24 + 46)                    | HRPA(D)          | 0.68    | 0.68    | 0.66     | 0.66     |
|          |         |                              | B3LYP            | 0.95    | 0.94    | 0.92     | 0.91     |
|          |         |                              | BHandH           | 0.53    | 0.53    | 0.51     | 0.51     |
|          |         |                              | PBE0             | 0.77    | 0.76    | 0.75     | 0.74     |
|          |         |                              | exp <sup>9</sup> |         |         |          | 1.047    |
|          |         | <sup>4</sup> J <sub>HH</sub> | SOPPA            | 1.27    | 1.26    | 1.30     | 1.29     |
|          |         | (35)                         | HRPA(D)          | 1.20    | 1.19    | 1.23     | 1.22     |
|          |         |                              | B3LYP            | 1.67    | 1.66    | 1.71     | 1.70     |
|          |         |                              | BHandH           | 1.12    | 1.11    | 1.15     | 1.14     |
|          |         |                              | PBE0             | 1.50    | 1.50    | 1.54     | 1.54     |
|          |         |                              | exp <sup>9</sup> |         |         |          | 1.822    |
|          |         | <sup>4</sup> J <sub>HH</sub> | SOPPA            | 2.21    | 2.20    | 2.32     | 2.31     |
|          |         | (26)                         | HRPA(D)          | 2.02    | 2.01    | 2.12     | 2.11     |
|          |         |                              | B3LYP            | 2.90    | 2.89    | 3.03     | 3.03     |
|          |         |                              | BHandH           | 2.45    | 2.44    | 2.57     | 2.57     |
|          |         |                              | PBE0             | 2.66    | 2.66    | 2.79     | 2.79     |
|          |         |                              | exp <sup>9</sup> |         |         |          | 2.794    |
|          |         | <sup>5</sup> J <sub>HH</sub> | SOPPA            | 0.90    | 0.91    | 0.89     | 0.89     |
|          |         |                              | HRPA(D)          | 0.65    | 0.65    | 0.64     | 0.64     |
|          |         |                              | B3LYP            | 0.51    | 0.51    | 0.50     | 0.50     |
|          |         |                              | BHandH           | 0.77    | 0.78    | 0.75     | 0.76     |
|          |         |                              | PBE0             | 0.70    | 0.71    | 0.69     | 0.70     |

*Continued on next page*

Table S1 – *Continued from previous page*

| Molecule                 | Solvent  | SSCC                    | Method           | vacuum-<br>vacuum | vacuum-<br>solvent | solvent-<br>vacuum | solvent-<br>solvent |
|--------------------------|----------|-------------------------|------------------|-------------------|--------------------|--------------------|---------------------|
|                          |          |                         | exp <sup>9</sup> |                   |                    |                    | 0.419               |
| 1,2-difluoro-<br>benzene | Methanol | $^3J_{FF}$              | SOPPA            | -18.89            | -19.44             | -18.92             | -19.37              |
|                          |          |                         | HRPA(D)          | -17.01            | -17.10             | -17.02             | -17.04              |
|                          |          |                         | B3LYP            | -18.41            | -19.23             | -18.46             | -19.19              |
|                          |          |                         | BHandH           | -13.51            | -13.74             | -14.27             | -14.43              |
|                          |          |                         | PBE0             | -17.96            | -18.59             | -18.23             | -18.78              |
|                          |          |                         | exp <sup>9</sup> |                   |                    |                    | -20.478             |
|                          |          | $^3J_{FH}$              | SOPPA            | 6.93              | 6.59               | 8.69               | 8.39                |
|                          |          |                         | HRPA(D)          | 6.77              | 6.46               | 8.26               | 7.98                |
|                          |          |                         | B3LYP            | 11.04             | 10.60              | 13.17              | 12.79               |
|                          |          |                         | BHandH           | 12.23             | 11.78              | 14.18              | 13.77               |
|                          |          |                         | PBE0             | 9.59              | 9.20               | 11.46              | 11.12               |
|                          |          |                         | exp <sup>9</sup> |                   |                    |                    | 10.949              |
|                          |          | $^4J_{FH}$<br>(13 + 26) | SOPPA            | 6.99              | 6.91               | 7.65               | 7.57                |
|                          |          |                         | HRPA(D)          | 6.13              | 6.05               | 6.68               | 6.61                |
|                          |          |                         | B3LYP            | 7.97              | 7.86               | 8.83               | 8.74                |
|                          |          |                         | BHandH           | 8.50              | 8.41               | 9.17               | 9.09                |
|                          |          |                         | PBE0             | 8.11              | 8.01               | 8.87               | 8.79                |
|                          |          |                         | exp <sup>9</sup> |                   |                    |                    | 8.151               |
|                          |          | $^4J_{FH}$<br>(15 + 24) | SOPPA            | 4.04              | 4.11               | 4.34               | 4.42                |
|                          |          |                         | HRPA(D)          | 3.57              | 3.63               | 3.81               | 3.89                |
|                          |          |                         | B3LYP            | 4.10              | 4.18               | 4.47               | 4.58                |
|                          |          |                         | BHandH           | 4.20              | 4.28               | 4.41               | 4.51                |
|                          |          |                         | PBE0             | 4.23              | 4.30               | 4.54               | 4.64                |
|                          |          |                         | exp <sup>9</sup> |                   |                    |                    | 4.531               |

*Continued on next page*

Table S1 – *Continued from previous page*

| Molecule | Solvent | SSCC                    | Method           | vacuum- | vacuum- | solvent- | solvent- |
|----------|---------|-------------------------|------------------|---------|---------|----------|----------|
|          |         |                         |                  | vacuum  | solvent | vacuum   | solvent  |
|          |         | $^5J_{FH}$              | SOPPA            | -2.38   | -2.40   | -2.25    | -2.27    |
|          |         |                         | HRPA(D)          | -1.55   | -1.56   | -1.46    | -1.47    |
|          |         |                         | B3LYP            | -1.49   | -1.51   | -1.38    | -1.40    |
|          |         |                         | BHandH           | -2.69   | -2.72   | -2.57    | -2.59    |
|          |         |                         | PBE0             | -1.96   | -1.98   | -1.85    | -1.87    |
|          |         |                         | exp <sup>9</sup> |         |         |          | -1.388   |
|          |         | $^5J_{HH}$              | SOPPA            | 0.79    | 0.79    | 0.77     | 0.77     |
|          |         |                         | HRPA(D)          | 0.57    | 0.57    | 0.56     | 0.56     |
|          |         |                         | B3LYP            | 0.35    | 0.34    | 0.34     | 0.33     |
|          |         |                         | BHandH           | 0.64    | 0.64    | 0.63     | 0.63     |
|          |         |                         | PBE0             | 0.53    | 0.53    | 0.52     | 0.52     |
|          |         |                         | exp <sup>9</sup> |         |         |          | 0.269    |
|          |         | $^4J_{HH}$              | SOPPA            | 1.13    | 1.11    | 1.12     | 1.11     |
|          |         |                         | HRPA(D)          | 1.08    | 1.07    | 1.08     | 1.06     |
|          |         |                         | B3LYP            | 1.49    | 1.47    | 1.49     | 1.47     |
|          |         |                         | BHandH           | 0.96    | 0.95    | 0.96     | 0.94     |
|          |         |                         | PBE0             | 1.32    | 1.31    | 1.32     | 1.31     |
|          |         |                         | exp <sup>9</sup> |         |         |          | 1.591    |
|          |         | $^3J_{HH}$<br>(34 + 56) | SOPPA            | 8.81    | 8.80    | 8.92     | 8.92     |
|          |         |                         | HRPA(D)          | 8.29    | 8.28    | 8.40     | 8.39     |
|          |         |                         | B3LYP            | 9.71    | 9.70    | 9.85     | 9.84     |
|          |         |                         | BHandH           | 10.37   | 10.35   | 10.50    | 10.49    |
|          |         |                         | PBE0             | 9.50    | 9.48    | 9.64     | 9.63     |
|          |         |                         | exp <sup>9</sup> |         |         |          | 8.313    |
|          |         | $^3J_{HH}$              | SOPPA            | 8.20    | 8.19    | 8.24     | 8.24     |

*Continued on next page*

Table S1 – *Continued from previous page*

| Molecule | Solvent | SSCC                         | Method            | vacuum- | vacuum- | solvent- | solvent- |
|----------|---------|------------------------------|-------------------|---------|---------|----------|----------|
|          |         |                              |                   | vacuum  | solvent | vacuum   | solvent  |
|          |         | (45)                         | HRPA(D)           | 7.74    | 7.74    | 7.79     | 7.79     |
|          |         |                              | B3LYP             | 8.89    | 8.87    | 8.96     | 8.94     |
|          |         |                              | BHandH            | 9.65    | 9.64    | 9.72     | 9.71     |
|          |         |                              | PBE0              | 8.69    | 8.68    | 8.76     | 8.75     |
|          |         |                              | exp <sup>9</sup>  |         |         |          | 7.628    |
|          | Ethanol | <sup>3</sup> J <sub>FF</sub> | SOPPA             | -18.89  | -19.43  | -18.92   | -19.37   |
|          |         |                              | HRPA(D)           | -17.01  | -17.10  | -17.02   | -17.04   |
|          |         |                              | B3LYP             | -18.41  | -19.22  | -18.46   | -19.18   |
|          |         |                              | BHandH            | -13.51  | -13.74  | -14.26   | -14.42   |
|          |         |                              | PBE0              | -17.96  | -18.58  | -18.23   | -18.77   |
|          |         |                              | exp <sup>9</sup>  |         |         |          | -20.634  |
|          |         | <sup>3</sup> J <sub>FH</sub> | SOPPA             | 6.93    | 6.59    | 8.66     | 8.37     |
|          |         |                              | HRPA(D)           | 6.77    | 6.46    | 8.24     | 7.96     |
|          |         |                              | B3LYP             | 11.04   | 10.61   | 13.14    | 12.77    |
|          |         |                              | BHandH            | 12.23   | 11.78   | 14.15    | 13.75    |
|          |         |                              | PBE0              | 9.59    | 9.20    | 11.44    | 11.10    |
|          |         |                              | exp <sup>9</sup>  |         |         |          | 10.822   |
|          |         | <sup>4</sup> J <sub>FH</sub> | SOPPA             | 6.99    | 6.91    | 7.64     | 7.57     |
|          |         |                              | (13 + 26) HRPA(D) | 6.13    | 6.05    | 6.67     | 6.61     |
|          |         |                              | B3LYP             | 7.97    | 7.86    | 8.82     | 8.73     |
|          |         |                              | BHandH            | 8.50    | 8.41    | 9.16     | 9.09     |
|          |         |                              | PBE0              | 8.11    | 8.01    | 8.86     | 8.78     |
|          |         |                              | exp <sup>9</sup>  |         |         |          | 8.063    |
|          |         | <sup>4</sup> J <sub>FH</sub> | SOPPA             | 4.04    | 4.11    | 4.33     | 4.42     |
|          |         |                              | (15 + 24) HRPA(D) | 3.57    | 3.63    | 3.81     | 3.88     |

*Continued on next page*

Table S1 – *Continued from previous page*

| Molecule | Solvent | SSCC | Method                       | vacuum-<br>vacuum | vacuum-<br>solvent | solvent-<br>vacuum | solvent-<br>solvent |
|----------|---------|------|------------------------------|-------------------|--------------------|--------------------|---------------------|
|          |         |      | B3LYP                        | 4.10              | 4.18               | 4.47               | 4.57                |
|          |         |      | BHandH                       | 4.20              | 4.28               | 4.41               | 4.51                |
|          |         |      | PBE0                         | 4.23              | 4.30               | 4.54               | 4.63                |
|          |         |      | exp <sup>9</sup>             |                   |                    |                    | 4.504               |
|          |         |      | <sup>5</sup> J <sub>FH</sub> |                   |                    |                    |                     |
|          |         |      | SOPPA                        | -2.38             | -2.40              | -2.25              | -2.27               |
|          |         |      | HRPA(D)                      | -1.55             | -1.56              | -1.46              | -1.47               |
|          |         |      | B3LYP                        | -1.49             | -1.51              | -1.38              | -1.40               |
|          |         |      | BHandH                       | -2.69             | -2.72              | -2.57              | -2.60               |
|          |         |      | PBE0                         | -1.96             | -1.98              | -1.85              | -1.88               |
|          |         |      | exp <sup>9</sup>             |                   |                    |                    | -1.401              |
|          |         |      | <sup>5</sup> J <sub>HH</sub> |                   |                    |                    |                     |
|          |         |      | SOPPA                        | 0.79              | 0.79               | 0.77               | 0.77                |
|          |         |      | HRPA(D)                      | 0.57              | 0.57               | 0.56               | 0.56                |
|          |         |      | B3LYP                        | 0.35              | 0.34               | 0.34               | 0.33                |
|          |         |      | BHandH                       | 0.64              | 0.64               | 0.63               | 0.64                |
|          |         |      | PBE0                         | 0.53              | 0.53               | 0.52               | 0.52                |
|          |         |      | exp <sup>9</sup>             |                   |                    |                    | 0.262               |
|          |         |      | <sup>4</sup> J <sub>HH</sub> |                   |                    |                    |                     |
|          |         |      | SOPPA                        | 1.13              | 1.11               | 1.12               | 1.11                |
|          |         |      | HRPA(D)                      | 1.08              | 1.07               | 1.08               | 1.06                |
|          |         |      | B3LYP                        | 1.49              | 1.47               | 1.49               | 1.47                |
|          |         |      | BHandH                       | 0.96              | 0.95               | 0.96               | 0.94                |
|          |         |      | PBE0                         | 1.32              | 1.31               | 1.32               | 1.31                |
|          |         |      | exp <sup>9</sup>             |                   |                    |                    | 1.602               |
|          |         |      | <sup>3</sup> J <sub>HH</sub> |                   |                    |                    |                     |
|          |         |      | SOPPA                        | 8.81              | 8.80               | 8.92               | 8.91                |
|          |         |      | (34 + 56) HRPA(D)            | 8.29              | 8.28               | 8.40               | 8.39                |
|          |         |      | B3LYP                        | 9.71              | 9.70               | 9.85               | 9.84                |

*Continued on next page*

Table S1 – *Continued from previous page*

| Molecule | Solvent | SSCC                         | Method            | vacuum-<br>vacuum | vacuum-<br>solvent | solvent-<br>vacuum | solvent-<br>solvent |
|----------|---------|------------------------------|-------------------|-------------------|--------------------|--------------------|---------------------|
|          |         |                              | BHandH            | 10.37             | 10.35              | 10.50              | 10.49               |
|          |         |                              | PBE0              | 9.50              | 9.48               | 9.64               | 9.63                |
|          |         |                              | exp <sup>9</sup>  |                   |                    |                    | 8.296               |
|          |         | <sup>3</sup> J <sub>HH</sub> | SOPPA             | 8.20              | 8.19               | 8.24               | 8.24                |
|          |         | (45)                         | HRPA(D)           | 7.74              | 7.74               | 7.79               | 7.79                |
|          |         |                              | B3LYP             | 8.89              | 8.87               | 8.96               | 8.94                |
|          |         |                              | BHandH            | 9.65              | 9.64               | 9.72               | 9.71                |
|          |         |                              | PBE0              | 8.69              | 8.68               | 8.76               | 8.74                |
|          |         |                              | exp <sup>9</sup>  |                   |                    |                    | 7.609               |
|          | Acetone | <sup>3</sup> J <sub>FF</sub> | SOPPA             | -18.89            | -19.43             | -18.92             | -19.36              |
|          |         |                              | HRPA(D)           | -17.01            | -17.09             | -17.02             | -17.04              |
|          |         |                              | B3LYP             | -18.41            | -19.21             | -18.46             | -19.17              |
|          |         |                              | BHandH            | -13.51            | -13.73             | -14.26             | -14.41              |
|          |         |                              | PBE0              | -17.96            | -18.57             | -18.22             | -18.77              |
|          |         |                              | exp <sup>9</sup>  |                   |                    |                    | -20.781             |
|          |         | <sup>3</sup> J <sub>FH</sub> | SOPPA             | 6.93              | 6.59               | 8.65               | 8.35                |
|          |         |                              | HRPA(D)           | 6.77              | 6.47               | 8.23               | 7.95                |
|          |         |                              | B3LYP             | 11.04             | 10.61              | 13.12              | 12.75               |
|          |         |                              | BHandH            | 12.23             | 11.79              | 14.13              | 13.73               |
|          |         |                              | PBE0              | 9.59              | 9.21               | 11.42              | 11.09               |
|          |         |                              | exp <sup>9</sup>  |                   |                    |                    | 11.082              |
|          |         | <sup>4</sup> J <sub>FH</sub> | SOPPA             | 6.99              | 6.91               | 7.63               | 7.56                |
|          |         |                              | (13 + 26) HRPA(D) | 6.13              | 6.05               | 6.67               | 6.6                 |
|          |         |                              | B3LYP             | 7.97              | 7.86               | 8.81               | 8.73                |
|          |         |                              | BHandH            | 8.50              | 8.41               | 9.15               | 9.08                |

*Continued on next page*



Table S1 – *Continued from previous page*

| Molecule | Solvent | SSCC                                      | Method           | vacuum- | vacuum- | solvent- | solvent- |
|----------|---------|-------------------------------------------|------------------|---------|---------|----------|----------|
|          |         |                                           |                  | vacuum  | solvent | vacuum   | solvent  |
|          |         |                                           | PBE0             | 8.11    | 8.01    | 8.85     | 8.77     |
|          |         |                                           | exp <sup>9</sup> |         |         |          | 8.167    |
|          |         | <sup>4</sup> J <sub>FH</sub><br>(15 + 24) | SOPPA            | 4.04    | 4.11    | 4.33     | 4.41     |
|          |         |                                           | HRPA(D)          | 3.57    | 3.62    | 3.81     | 3.88     |
|          |         |                                           | B3LYP            | 4.10    | 4.18    | 4.47     | 4.57     |
|          |         |                                           | BHandH           | 4.20    | 4.27    | 4.41     | 4.50     |
|          |         |                                           | PBE0             | 4.23    | 4.30    | 4.53     | 4.63     |
|          |         |                                           | exp <sup>9</sup> |         |         |          | 4.586    |
|          |         | <sup>5</sup> J <sub>FH</sub>              | SOPPA            | -2.38   | -2.4    | -2.25    | -2.27    |
|          |         |                                           | HRPA(D)          | -1.55   | -1.56   | -1.46    | -1.47    |
|          |         |                                           | B3LYP            | -1.49   | -1.51   | -1.38    | -1.40    |
|          |         |                                           | BHandH           | -2.69   | -2.72   | -2.57    | -2.60    |
|          |         |                                           | PBE0             | -1.96   | -1.98   | -1.85    | -1.88    |
|          |         |                                           | exp <sup>9</sup> |         |         |          | -1.367   |
|          |         | <sup>5</sup> J <sub>HH</sub>              | SOPPA            | 0.79    | 0.79    | 0.77     | 0.77     |
|          |         |                                           | HRPA(D)          | 0.57    | 0.57    | 0.56     | 0.56     |
|          |         |                                           | B3LYP            | 0.35    | 0.34    | 0.34     | 0.33     |
|          |         |                                           | BHandH           | 0.64    | 0.64    | 0.63     | 0.64     |
|          |         |                                           | PBE0             | 0.53    | 0.53    | 0.52     | 0.52     |
|          |         |                                           | exp <sup>9</sup> |         |         |          | 0.264    |
|          |         | <sup>4</sup> J <sub>HH</sub>              | SOPPA            | 1.13    | 1.11    | 1.12     | 1.11     |
|          |         |                                           | HRPA(D)          | 1.08    | 1.07    | 1.08     | 1.06     |
|          |         |                                           | B3LYP            | 1.49    | 1.47    | 1.49     | 1.47     |
|          |         |                                           | BHandH           | 0.96    | 0.95    | 0.96     | 0.94     |
|          |         |                                           | PBE0             | 1.32    | 1.31    | 1.32     | 1.31     |

*Continued on next page*

Table S1 – *Continued from previous page*

| Molecule               | Solvent     | SSCC                                 | Method                       | vacuum-<br>vacuum | vacuum-<br>solvent | solvent-<br>vacuum | solvent-<br>solvent |        |
|------------------------|-------------|--------------------------------------|------------------------------|-------------------|--------------------|--------------------|---------------------|--------|
|                        |             | (34 + 56)                            | exp <sup>9</sup>             |                   |                    |                    | 1.601               |        |
|                        |             |                                      | <sup>3</sup> J <sub>HH</sub> | SOPPA             | 8.81               | 8.8                | 8.92                | 8.91   |
|                        |             |                                      |                              | HRPA(D)           | 8.29               | 8.28               | 8.4                 | 8.39   |
|                        |             |                                      |                              | B3LYP             | 9.71               | 9.70               | 9.85                | 9.84   |
|                        |             |                                      |                              | BHandH            | 10.37              | 10.35              | 10.50               | 10.48  |
|                        |             |                                      |                              | PBE0              | 9.50               | 9.48               | 9.64                | 9.63   |
|                        |             |                                      |                              | exp <sup>9</sup>  |                    |                    |                     | 8.309  |
|                        |             | (45)                                 | <sup>3</sup> J <sub>HH</sub> | SOPPA             | 8.2                | 8.19               | 8.24                | 8.24   |
|                        |             |                                      |                              | HRPA(D)           | 7.74               | 7.74               | 7.79                | 7.79   |
|                        |             |                                      |                              | B3LYP             | 8.89               | 8.87               | 8.95                | 8.94   |
|                        |             |                                      |                              | BHandH            | 9.65               | 9.64               | 9.72                | 9.71   |
|                        |             |                                      |                              | PBE0              | 8.69               | 8.68               | 8.76                | 8.74   |
|                        |             |                                      |                              | exp <sup>9</sup>  |                    |                    |                     | 7.605  |
| 1,2-dichloro-ethene    | Cyclohexane | <sup>2</sup> J <sub>CH</sub>         | SOPPA                        | 11.91             | 12.00              | 12.10              | 12.19               |        |
|                        |             |                                      |                              | HRPA(D)           | 11.40              | 11.48              | 11.55               | 11.64  |
|                        |             |                                      |                              | B3LYP             | 18.78              | 18.91              | 19.01               | 19.14  |
|                        |             |                                      |                              | BHandH            | 13.18              | 13.29              | 13.34               | 13.46  |
|                        |             |                                      |                              | PBE0              | 15.92              | 16.03              | 16.11               | 16.23  |
|                        |             |                                      |                              | exp <sup>8</sup>  |                    |                    |                     | 13.3   |
| 1,1,2-trichloro-ethane | Chloroform  | <sup>1</sup> J <sub>CH</sub><br>(CH) | SOPPA                        | 172.99            | 173.38             | 177.59             | 178.14              |        |
|                        |             |                                      |                              | HRPA(D)           | 172.71             | 173.10             | 177.26              | 177.82 |
|                        |             |                                      |                              | B3LYP             | 182.99             | 183.53             | 188.00              | 188.59 |
|                        |             |                                      |                              | BHandH            | 169.35             | 169.84             | 173.68              | 174.21 |
|                        |             |                                      |                              | PBE0              | 170.22             | 170.71             | 174.79              | 175.33 |
|                        |             |                                      |                              | exp <sup>10</sup> |                    |                    |                     | 181.89 |

*Continued on next page*

Table S1 – *Continued from previous page*

| Molecule | Solvent      | SSCC       | Method            | vacuum-<br>vacuum | vacuum-<br>solvent | solvent-<br>vacuum | solvent-<br>solvent |
|----------|--------------|------------|-------------------|-------------------|--------------------|--------------------|---------------------|
|          |              | $^1J_{CH}$ | SOPPA             | 152.35            | 152.55             | 155.48             | 155.78              |
|          |              | $(CH_2)$   | HRPA(D)           | 152.22            | 152.41             | 155.32             | 155.62              |
|          |              |            | B3LYP             | 159.36            | 159.68             | 162.70             | 163.05              |
|          |              |            | BHandH            | 148.51            | 148.73             | 151.45             | 151.70              |
|          |              |            | PBE0              | 148.38            | 148.61             | 151.41             | 151.68              |
|          |              |            | exp <sup>10</sup> |                   |                    |                    | 155.27              |
|          | Acetone      | $^1J_{CH}$ | SOPPA             | 172.99            | 173.48             | 178.66             | 179.21              |
|          |              | $(CH)$     | HRPA(D)           | 172.71            | 173.20             | 178.32             | 178.88              |
|          |              |            | B3LYP             | 182.99            | 183.67             | 189.19             | 189.96              |
|          |              |            | BHandH            | 169.35            | 169.96             | 174.69             | 175.38              |
|          |              |            | PBE0              | 170.22            | 170.83             | 175.88             | 176.56              |
|          |              |            | exp <sup>10</sup> |                   |                    |                    | 183.59              |
|          |              | $^1J_{CH}$ | SOPPA             | 152.35            | 152.60             | 156.23             | 156.53              |
|          |              | $(CH_2)$   | HRPA(D)           | 152.22            | 152.47             | 156.07             | 156.37              |
|          |              |            | B3LYP             | 159.36            | 159.77             | 163.51             | 163.98              |
|          |              |            | BHandH            | 148.51            | 148.79             | 152.17             | 152.50              |
|          |              |            | PBE0              | 148.38            | 148.68             | 152.15             | 152.51              |
|          |              |            | exp <sup>10</sup> |                   |                    |                    | 155.88              |
|          | Acetonitrile | $^1J_{CH}$ | SOPPA             | 172.99            | 173.49             | 178.81             | 179.38              |
|          |              | $(CH)$     | HRPA(D)           | 172.71            | 173.21             | 178.47             | 179.04              |
|          |              |            | B3LYP             | 182.99            | 183.69             | 189.36             | 190.16              |
|          |              |            | BHandH            | 169.35            | 169.98             | 174.84             | 175.54              |
|          |              |            | PBE0              | 170.22            | 170.85             | 176.03             | 176.74              |
|          |              |            | exp <sup>10</sup> |                   |                    |                    | 183.35              |
|          |              | $^1J_{CH}$ | SOPPA             | 152.35            | 152.61             | 156.34             | 156.65              |

*Continued on next page*

Table S1 – *Continued from previous page*

| Molecule                       | Solvent    | SSCC                         | Method            | vacuum-<br>vacuum | vacuum-<br>solvent | solvent-<br>vacuum | solvent-<br>solvent |
|--------------------------------|------------|------------------------------|-------------------|-------------------|--------------------|--------------------|---------------------|
|                                | DMSO       | (CH <sub>2</sub> )           | HRPA(D)           | 152.22            | 152.48             | 156.18             | 156.48              |
|                                |            |                              | B3LYP             | 159.36            | 159.78             | 163.63             | 164.11              |
|                                |            |                              | BHandH            | 148.51            | 148.80             | 152.27             | 152.61              |
|                                |            |                              | PBE0              | 148.38            | 148.69             | 152.25             | 152.62              |
|                                |            |                              | exp <sup>10</sup> |                   |                    |                    | 156.25              |
|                                |            | (CH)                         | SOPPA             | 172.99            | 173.49             | 178.85             | 179.43              |
|                                |            |                              | HRPA(D)           | 172.71            | 173.21             | 178.51             | 179.09              |
|                                |            |                              | B3LYP             | 182.99            | 183.70             | 189.40             | 190.21              |
|                                |            |                              | BHandH            | 169.35            | 169.98             | 174.88             | 175.59              |
|                                |            |                              | PBE0              | 170.22            | 170.85             | 176.07             | 176.79              |
|                                |            |                              | exp <sup>10</sup> |                   |                    |                    | 184.04              |
|                                |            | (CH <sub>2</sub> )           | SOPPA             | 152.35            | 152.61             | 156.37             | 156.68              |
|                                |            |                              | HRPA(D)           | 152.22            | 152.48             | 156.21             | 156.52              |
|                                |            |                              | B3LYP             | 159.36            | 159.79             | 163.66             | 164.15              |
|                                |            |                              | BHandH            | 148.51            | 148.80             | 152.30             | 152.64              |
|                                |            |                              | PBE0              | 148.38            | 148.69             | 152.28             | 152.66              |
|                                |            |                              | exp <sup>10</sup> |                   |                    |                    | 156.66              |
| 1,1,2,2-tetra-<br>chloroethane | Chloroform | <sup>1</sup> J <sub>CH</sub> | SOPPA             | 179.20            | 179.57             | 182.33             | 182.78              |
|                                |            | (CH)                         | HRPA(D)           | 178.80            | 179.17             | 181.90             | 182.35              |
|                                |            |                              | B3LYP             | 190.69            | 191.10             | 194.10             | 194.63              |
|                                |            |                              | BHandH            | 175.44            | 175.90             | 178.35             | 178.91              |
|                                |            |                              | PBE0              | 177.24            | 177.66             | 180.38             | 180.90              |
|                                |            |                              | exp <sup>10</sup> |                   |                    |                    | 181.15              |
|                                | Acetone    | <sup>1</sup> J <sub>CH</sub> | SOPPA             | 179.20            | 179.65             | 183.04             | 183.61              |
|                                |            | (CH)                         | HRPA(D)           | 178.80            | 179.26             | 182.59             | 183.17              |

*Continued on next page*

Table S1 – *Continued from previous page*

| Molecule  | Solvent    | SSCC                                                  | Method            | vacuum-<br>vacuum | vacuum-<br>solvent | solvent-<br>vacuum | solvent-<br>solvent |
|-----------|------------|-------------------------------------------------------|-------------------|-------------------|--------------------|--------------------|---------------------|
|           |            |                                                       | B3LYP             | 190.69            | 191.20             | 194.89             | 195.57              |
|           |            |                                                       | BHandH            | 175.44            | 176.02             | 179.02             | 179.74              |
|           |            |                                                       | PBE0              | 177.24            | 177.71             | 181.10             | 181.64              |
|           |            |                                                       | exp <sup>10</sup> |                   |                    |                    | 184.08              |
|           |            |                                                       | SOPPA             | 179.20            | 179.66             | 183.13             | 183.73              |
|           |            |                                                       | (CH) HRPA(D)      | 178.80            | 179.27             | 182.69             | 183.28              |
|           |            |                                                       | B3LYP             | 190.69            | 191.22             | 195.00             | 195.71              |
|           |            |                                                       | BHandH            | 175.44            | 176.02             | 179.11             | 179.84              |
|           |            |                                                       | PBE0              | 177.24            | 177.76             | 181.20             | 181.88              |
|           |            |                                                       | exp <sup>10</sup> |                   |                    |                    | 184.09              |
|           | DMSO       | <sup>1</sup> J <sub>CH</sub><br>(CH)                  | SOPPA             | 179.20            | 179.67             | 183.16             | 183.76              |
|           |            |                                                       | HRPA(D)           | 178.80            | 179.27             | 182.72             | 183.31              |
|           |            |                                                       | B3LYP             | 190.69            | 191.22             | 195.03             | 195.75              |
|           |            |                                                       | BHandH            | 175.44            | 176.03             | 179.13             | 179.88              |
|           |            |                                                       | PBE0              | 177.24            | 177.77             | 181.22             | 181.91              |
|           |            |                                                       | exp <sup>10</sup> |                   |                    |                    | 185.54              |
| Imidazole | Chloroform | <sup>1</sup> J <sub>CH</sub><br>(N $\underline{C}$ N) | SOPPA             | 212.62            | 212.76             | 214.54             | 214.74              |
|           |            |                                                       | HRPA(D)           | 211.08            | 211.23             | 213.10             | 213.3               |
|           |            |                                                       | B3LYP             | 220.03            | 219.98             | 221.7              | 221.71              |
|           |            |                                                       | BHandH            | 203.88            | 203.96             | 205.52             | 205.66              |
|           |            |                                                       | PBE0              | 205.62            | 205.67             | 207.25             | 207.36              |
|           |            |                                                       | exp <sup>8</sup>  |                   |                    |                    | 205.1               |
|           |            | <sup>1</sup> J <sub>CH</sub><br>(N $\underline{C}$ C) | SOPPA             | 194.15            | 195.02             | 192.46             | 193.32              |
|           |            |                                                       | HRPA(D)           | 193.11            | 193.96             | 191.48             | 192.34              |
|           |            |                                                       | B3LYP             | 201.24            | 202.07             | 199.59             | 200.42              |

*Continued on next page*

Table S1 – *Continued from previous page*

| Molecule               | Solvent    | SSCC                                                                         | Method            | vacuum-<br>vacuum | vacuum-<br>solvent | solvent-<br>vacuum | solvent-<br>solvent |
|------------------------|------------|------------------------------------------------------------------------------|-------------------|-------------------|--------------------|--------------------|---------------------|
|                        | DMSO       |                                                                              | BHandH            | 187.24            | 188.08             | 185.63             | 186.47              |
|                        |            |                                                                              | PBE0              | 188.59            | 189.41             | 186.92             | 187.74              |
|                        |            |                                                                              | exp <sup>8</sup>  |                   |                    |                    | 188.6               |
|                        |            | <sup>1</sup> <i>J<sub>CH</sub></i><br>( <i>N<math>\overline{C}</math>N</i> ) | SOPPA             | 212.62            | 212.80             | 215.04             | 215.32              |
|                        |            |                                                                              | HRPA(D)           | 211.08            | 211.27             | 213.62             | 213.90              |
|                        |            |                                                                              | B3LYP             | 220.03            | 219.97             | 222.12             | 222.17              |
|                        |            |                                                                              | BHandH            | 203.88            | 203.99             | 205.93             | 206.14              |
|                        |            |                                                                              | PBE0              | 205.62            | 205.68             | 207.67             | 207.83              |
|                        |            |                                                                              | exp <sup>8</sup>  |                   |                    |                    | 206.1               |
|                        |            | <sup>1</sup> <i>J<sub>CH</sub></i><br>( <i>N<math>\overline{C}</math>C</i> ) | SOPPA             | 194.15            | 195.27             | 191.80             | 192.92              |
|                        |            |                                                                              | HRPA(D)           | 193.11            | 194.22             | 190.85             | 191.96              |
|                        |            |                                                                              | B3LYP             | 201.24            | 202.32             | 198.96             | 200.03              |
|                        |            |                                                                              | BHandH            | 187.24            | 188.33             | 185.02             | 186.11              |
|                        |            |                                                                              | PBE0              | 188.59            | 189.66             | 186.28             | 187.34              |
|                        |            |                                                                              | exp <sup>8</sup>  |                   |                    |                    | 187.7               |
| 1-methyl-<br>imidazole | Chloroform | <sup>1</sup> <i>J<sub>CH</sub></i><br>( <i>C</i> 2)                          | SOPPA             | 209.87            | 210.18             | 212.01             | 212.36              |
|                        |            |                                                                              | HRPA(D)           | 208.41            | 208.72             | 210.63             | 210.98              |
|                        |            |                                                                              | B3LYP             | 217.22            | 217.33             | 219.09             | 219.25              |
|                        |            |                                                                              | BHandH            | 201.23            | 201.49             | 203.04             | 203.35              |
|                        |            |                                                                              | PBE0              | 202.97            | 203.19             | 204.79             | 205.05              |
|                        |            |                                                                              | exp <sup>11</sup> |                   |                    |                    | 206.8               |
|                        |            | <sup>1</sup> <i>J<sub>CH</sub></i><br>( <i>C</i> 5)                          | SOPPA             | 189.62            | 189.22             | 193.10             | 192.73              |
|                        |            |                                                                              | HRPA(D)           | 189.13            | 188.73             | 192.56             | 192.19              |
|                        |            |                                                                              | B3LYP             | 195.61            | 195.22             | 199.40             | 199.04              |
|                        |            |                                                                              | BHandH            | 182.29            | 182.00             | 185.69             | 185.42              |

*Continued on next page*

Table S1 – *Continued from previous page*

| Molecule | Solvent | SSCC                         | Method            | vacuum-<br>vacuum | vacuum-<br>solvent | solvent-<br>vacuum | solvent-<br>solvent |
|----------|---------|------------------------------|-------------------|-------------------|--------------------|--------------------|---------------------|
|          |         |                              | PBE0              | 183.27            | 182.92             | 186.89             | 186.56              |
|          |         |                              | exp <sup>11</sup> |                   |                    |                    | 188.0               |
|          |         | <sup>1</sup> J <sub>CH</sub> | SOPPA             | 138.72            | 139.07             | 140.16             | 140.52              |
|          |         | (CH <sub>3</sub> )           | HRPA(D)           | 138.60            | 138.96             | 140.02             | 140.39              |
|          |         |                              | B3LYP             | 143.58            | 143.95             | 145.07             | 145.45              |
|          |         |                              | BHandH            | 134.23            | 134.53             | 135.58             | 135.88              |
|          |         |                              | PBE0              | 134.01            | 134.34             | 135.43             | 135.76              |
|          |         |                              | exp <sup>11</sup> |                   |                    |                    | 139.8               |
|          |         | <sup>1</sup> J <sub>CH</sub> | SOPPA             | 193.13            | 193.91             | 191.77             | 192.54              |
|          |         | (C4)                         | HRPA(D)           | 192.10            | 192.86             | 190.80             | 191.56              |
|          |         |                              | B3LYP             | 199.91            | 200.67             | 198.63             | 199.38              |
|          |         |                              | BHandH            | 186.15            | 186.91             | 184.94             | 185.70              |
|          |         |                              | PBE0              | 187.42            | 188.17             | 186.12             | 186.88              |
|          |         |                              | exp <sup>11</sup> |                   |                    |                    | 188.2               |
|          |         | <sup>2</sup> J <sub>CH</sub> | SOPPA             | 8.42              | 8.35               | 9.14               | 9.07                |
|          |         | (45)                         | HRPA(D)           | 8.37              | 8.29               | 9.03               | 8.96                |
|          |         |                              | B3LYP             | 10.20             | 10.11              | 10.96              | 10.88               |
|          |         |                              | BHandH            | 8.49              | 8.43               | 9.18               | 9.13                |
|          |         |                              | PBE0              | 8.94              | 8.86               | 9.69               | 9.61                |
|          |         |                              | exp <sup>11</sup> |                   |                    |                    | 10.4                |
|          |         | <sup>3</sup> J <sub>CH</sub> | SOPPA             | 11.63             | 11.52              | 11.43              | 11.31               |
|          |         | (42)                         | HRPA(D)           | 10.78             | 10.67              | 10.63              | 10.51               |
|          |         |                              | B3LYP             | 12.46             | 12.33              | 12.33              | 12.19               |
|          |         |                              | BHandH            | 12.40             | 12.28              | 12.22              | 12.09               |
|          |         |                              | PBE0              | 12.30             | 12.18              | 12.15              | 12.02               |

*Continued on next page*

Table S1 – *Continued from previous page*

| Molecule | Solvent | SSCC                         | Method  | vacuum-<br>vacuum | vacuum-<br>solvent | solvent-<br>vacuum | solvent-<br>solvent |
|----------|---------|------------------------------|---------|-------------------|--------------------|--------------------|---------------------|
| Pyridine |         | exp <sup>11</sup>            |         |                   |                    |                    | 10.4                |
|          |         | <sup>1</sup> J <sub>CH</sub> | SOPPA   | 209.87            | 210.24             | 212.39             | 212.83              |
|          |         | (C2)                         | HRPA(D) | 208.41            | 208.78             | 211.02             | 211.46              |
|          |         |                              | B3LYP   | 217.22            | 217.35             | 219.41             | 219.62              |
|          |         |                              | BHandH  | 201.23            | 201.54             | 203.35             | 203.73              |
|          |         |                              | PBE0    | 202.97            | 203.23             | 205.10             | 205.44              |
|          |         | exp <sup>11</sup>            |         |                   |                    |                    | 204.5               |
|          |         | <sup>1</sup> J <sub>CH</sub> | SOPPA   | 189.62            | 189.13             | 193.82             | 193.39              |
|          |         | (C5)                         | HRPA(D) | 189.13            | 188.65             | 193.28             | 192.85              |
|          |         |                              | B3LYP   | 195.61            | 195.13             | 200.20             | 199.77              |
|          |         |                              | BHandH  | 182.29            | 181.93             | 186.40             | 186.09              |
|          |         |                              | PBE0    | 183.27            | 182.84             | 187.65             | 187.27              |
|          |         | exp <sup>11</sup>            |         |                   |                    |                    | 188.2               |
|          |         | <sup>1</sup> J <sub>CH</sub> | SOPPA   | 138.72            | 139.15             | 140.46             | 140.90              |
|          |         | (CH <sub>3</sub> )           | HRPA(D) | 138.60            | 139.03             | 140.31             | 140.76              |
|          |         |                              | B3LYP   | 143.58            | 144.03             | 145.39             | 145.85              |
|          |         |                              | BHandH  | 134.23            | 134.59             | 135.85             | 136.22              |
|          |         |                              | PBE0    | 134.01            | 134.41             | 135.72             | 136.13              |
|          |         | exp <sup>11</sup>            |         |                   |                    |                    | 139.5               |
|          |         | <sup>1</sup> J <sub>CH</sub> | SOPPA   | 193.13            | 194.06             | 191.41             | 192.34              |
|          |         | (C4)                         | HRPA(D) | 192.10            | 193.01             | 190.45             | 191.37              |
|          |         |                              | B3LYP   | 199.91            | 200.83             | 198.28             | 199.20              |
|          |         |                              | BHandH  | 186.15            | 187.07             | 184.62             | 185.54              |
|          |         |                              | PBE0    | 187.42            | 188.32             | 185.78             | 186.69              |
|          |         | exp <sup>11</sup>            |         |                   |                    |                    | 187.4               |

*Continued on next page*



Table S1 – *Continued from previous page*

| Molecule | Solvent | SSCC       | Method            | vacuum-<br>vacuum | vacuum-<br>solvent | solvent-<br>vacuum | solvent-<br>solvent |
|----------|---------|------------|-------------------|-------------------|--------------------|--------------------|---------------------|
|          |         | $^2J_{CH}$ | SOPPA             | 8.42              | 8.33               | 9.28               | 9.20                |
|          |         | (45)       | HRPA(D)           | 8.37              | 8.28               | 9.15               | 9.07                |
|          |         |            | B3LYP             | 10.20             | 10.09              | 11.11              | 11.02               |
|          |         |            | BHandH            | 8.49              | 8.42               | 9.32               | 9.26                |
|          |         |            | PBE0              | 8.94              | 8.85               | 9.83               | 9.75                |
|          |         |            | exp <sup>11</sup> |                   |                    |                    | 10.6                |
|          |         | $^3J_{CH}$ | SOPPA             | 11.63             | 11.49              | 11.39              | 11.24               |
|          |         | (42)       | HRPA(D)           | 10.78             | 10.65              | 10.60              | 10.46               |
|          |         |            | B3LYP             | 12.46             | 12.31              | 12.30              | 12.14               |
|          |         |            | BHandH            | 12.40             | 12.26              | 12.19              | 12.03               |
|          |         |            | PBE0              | 12.30             | 12.16              | 12.12              | 11.97               |
|          |         |            | exp <sup>11</sup> |                   |                    |                    | 10.6                |
|          | Acetone | $^1J_{CH}$ | SOPPA             | 209.87            | 210.25             | 212.48             | 212.93              |
|          |         | (C2)       | HRPA(D)           | 208.41            | 208.79             | 211.11             | 211.56              |
|          |         |            | B3LYP             | 217.22            | 217.36             | 219.48             | 219.71              |
|          |         |            | BHandH            | 201.23            | 201.55             | 203.42             | 203.82              |
|          |         |            | PBE0              | 202.97            | 203.24             | 205.18             | 205.53              |
|          |         |            | exp <sup>11</sup> |                   |                    |                    | 206.7               |
|          |         | $^1J_{CH}$ | SOPPA             | 189.62            | 189.11             | 194.00             | 193.55              |
|          |         | (C5)       | HRPA(D)           | 189.13            | 188.63             | 193.45             | 193.00              |
|          |         |            | B3LYP             | 195.61            | 195.11             | 200.39             | 199.95              |
|          |         |            | BHandH            | 182.29            | 181.92             | 186.57             | 186.25              |
|          |         |            | PBE0              | 183.27            | 182.82             | 187.83             | 187.44              |
|          |         |            | exp <sup>11</sup> |                   |                    |                    | 186.2               |
|          |         | $^1J_{CH}$ | SOPPA             | 138.72            | 139.17             | 140.53             | 140.99              |

*Continued on next page*

Table S1 – *Continued from previous page*

| Molecule | Solvent | SSCC                         | Method            | vacuum-<br>vacuum | vacuum-<br>solvent | solvent-<br>vacuum | solvent-<br>solvent |
|----------|---------|------------------------------|-------------------|-------------------|--------------------|--------------------|---------------------|
|          |         | (CH <sub>3</sub> )           | HRPA(D)           | 138.60            | 139.05             | 140.39             | 140.85              |
|          |         |                              | B3LYP             | 143.58            | 144.05             | 145.46             | 145.94              |
|          |         |                              | BHandH            | 134.23            | 134.60             | 135.92             | 136.30              |
|          |         |                              | PBE0              | 134.01            | 134.43             | 135.79             | 136.21              |
|          |         |                              | exp <sup>11</sup> |                   |                    |                    | 139.8               |
|          |         | <sup>1</sup> J <sub>CH</sub> | SOPPA             | 193.13            | 194.09             | 191.32             | 192.28              |
|          |         | (C4)                         | HRPA(D)           | 192.10            | 193.05             | 190.36             | 191.31              |
|          |         |                              | B3LYP             | 199.91            | 200.87             | 198.20             | 199.15              |
|          |         |                              | BHandH            | 186.15            | 187.10             | 184.54             | 185.49              |
|          |         |                              | PBE0              | 187.42            | 188.36             | 185.70             | 186.64              |
|          |         |                              | exp <sup>11</sup> |                   |                    |                    | 187.1               |
|          |         | <sup>2</sup> J <sub>CH</sub> | SOPPA             | 8.42              | 8.33               | 9.31               | 9.23                |
|          |         | (45)                         | HRPA(D)           | 8.37              | 8.27               | 9.18               | 9.10                |
|          |         |                              | B3LYP             | 10.20             | 10.09              | 11.15              | 11.05               |
|          |         |                              | BHandH            | 8.49              | 8.42               | 9.35               | 9.28                |
|          |         |                              | PBE0              | 8.94              | 8.84               | 9.87               | 9.78                |
|          |         |                              | exp <sup>11</sup> |                   |                    |                    | 10.6                |
|          |         | <sup>3</sup> J <sub>CH</sub> | SOPPA             | 11.63             | 11.49              | 11.38              | 11.23               |
|          |         | (42)                         | HRPA(D)           | 10.78             | 10.64              | 10.59              | 10.44               |
|          |         |                              | B3LYP             | 12.46             | 12.30              | 12.30              | 12.12               |
|          |         |                              | BHandH            | 12.40             | 12.25              | 12.18              | 12.02               |
|          |         |                              | PBE0              | 12.30             | 12.15              | 12.11              | 11.95               |
|          |         |                              | exp <sup>11</sup> |                   |                    |                    | 10.6                |
|          | DMSO    | <sup>1</sup> J <sub>CH</sub> | SOPPA             | 209.87            | 210.26             | 212.56             | 213.03              |
|          |         | (C2)                         | HRPA(D)           | 208.41            | 208.81             | 211.19             | 211.67              |

*Continued on next page*

Table S1 – *Continued from previous page*

| Molecule | Solvent | SSCC                                               | Method            | vacuum-<br>vacuum | vacuum-<br>solvent | solvent-<br>vacuum | solvent-<br>solvent |
|----------|---------|----------------------------------------------------|-------------------|-------------------|--------------------|--------------------|---------------------|
|          |         |                                                    | B3LYP             | 217.22            | 217.37             | 219.55             | 219.79              |
|          |         |                                                    | BHandH            | 201.23            | 201.57             | 203.49             | 203.91              |
|          |         |                                                    | PBE0              | 202.97            | 203.25             | 205.24             | 205.60              |
|          |         |                                                    | exp <sup>11</sup> |                   |                    |                    | 207.0               |
|          |         | <sup>1</sup> J <sub>CH</sub><br>(C5)               | SOPPA             | 189.62            | 189.10             | 194.16             | 193.69              |
|          |         |                                                    | HRPA(D)           | 189.13            | 188.62             | 193.61             | 193.14              |
|          |         |                                                    | B3LYP             | 195.61            | 195.10             | 200.57             | 200.12              |
|          |         |                                                    | BHandH            | 182.29            | 181.90             | 186.73             | 186.39              |
|          |         |                                                    | PBE0              | 183.27            | 182.81             | 188.00             | 187.60              |
|          |         |                                                    | exp <sup>11</sup> |                   |                    |                    | 189.0               |
|          |         | <sup>1</sup> J <sub>CH</sub><br>(CH <sub>3</sub> ) | SOPPA             | 138.72            | 139.18             | 140.60             | 141.07              |
|          |         |                                                    | HRPA(D)           | 138.60            | 139.07             | 140.45             | 140.93              |
|          |         |                                                    | B3LYP             | 143.58            | 144.06             | 145.53             | 146.03              |
|          |         |                                                    | BHandH            | 134.23            | 134.62             | 135.98             | 136.38              |
|          |         |                                                    | PBE0              | 134.01            | 134.44             | 135.86             | 136.30              |
|          |         |                                                    | exp <sup>11</sup> |                   |                    |                    | 139.8               |
|          |         | <sup>1</sup> J <sub>CH</sub><br>(C4)               | SOPPA             | 193.13            | 194.13             | 191.23             | 192.23              |
|          |         |                                                    | HRPA(D)           | 192.10            | 193.08             | 190.28             | 191.26              |
|          |         |                                                    | B3LYP             | 199.91            | 200.89             | 198.12             | 199.10              |
|          |         |                                                    | BHandH            | 186.15            | 187.14             | 184.46             | 185.45              |
|          |         |                                                    | PBE0              | 187.42            | 188.39             | 185.62             | 186.59              |
|          |         |                                                    | exp <sup>11</sup> |                   |                    |                    | 187.0               |
|          |         | <sup>2</sup> J <sub>CH</sub><br>(45)               | SOPPA             | 8.42              | 8.33               | 9.34               | 9.26                |
|          |         |                                                    | HRPA(D)           | 8.37              | 8.27               | 9.21               | 9.12                |
|          |         |                                                    | B3LYP             | 10.20             | 10.09              | 11.18              | 11.08               |

*Continued on next page*

Table S1 – *Continued from previous page*

| Molecule | Solvent | SSCC                                                             | Method            | vacuum-<br>vacuum | vacuum-<br>solvent | solvent-<br>vacuum | solvent-<br>solvent |
|----------|---------|------------------------------------------------------------------|-------------------|-------------------|--------------------|--------------------|---------------------|
|          |         |                                                                  | BHandH            | 8.49              | 8.41               | 9.38               | 9.31                |
|          |         |                                                                  | PBE0              | 8.94              | 8.84               | 9.90               | 9.81                |
|          |         |                                                                  | exp <sup>11</sup> |                   |                    |                    | 10.7                |
|          |         | <sup>3</sup> <i>J<sub>CH</sub></i><br>(42)                       | SOPPA             | 11.63             | 11.48              | 11.37              | 11.21               |
|          |         |                                                                  | HRPA(D)           | 10.78             | 10.64              | 10.58              | 10.43               |
|          |         |                                                                  | B3LYP             | 12.46             | 12.30              | 12.29              | 12.11               |
|          |         |                                                                  | BHandH            | 12.40             | 12.25              | 12.17              | 12.00               |
|          |         |                                                                  | PBE0              | 12.30             | 12.15              | 12.11              | 11.94               |
|          |         |                                                                  | exp <sup>11</sup> |                   |                    |                    | 10.7                |
|          | Water   | <sup>1</sup> <i>J<sub>CH</sub></i><br>( <i>C</i> 2)              | SOPPA             | 209.87            | 210.27             | 212.59             | 213.06              |
|          |         |                                                                  | HRPA(D)           | 208.41            | 208.81             | 211.22             | 211.70              |
|          |         |                                                                  | B3LYP             | 217.22            | 217.37             | 219.57             | 219.82              |
|          |         |                                                                  | BHandH            | 201.23            | 201.57             | 203.51             | 203.93              |
|          |         |                                                                  | PBE0              | 202.97            | 203.25             | 205.26             | 205.63              |
|          |         |                                                                  | exp <sup>11</sup> |                   |                    |                    | 206.7               |
|          |         | <sup>1</sup> <i>J<sub>CH</sub></i><br>( <i>C</i> 5)              | SOPPA             | 189.62            | 189.09             | 194.21             | 193.74              |
|          |         |                                                                  | HRPA(D)           | 189.13            | 188.61             | 193.66             | 193.20              |
|          |         |                                                                  | B3LYP             | 195.61            | 195.09             | 200.63             | 200.18              |
|          |         |                                                                  | BHandH            | 182.29            | 181.90             | 186.78             | 186.45              |
|          |         |                                                                  | PBE0              | 183.27            | 182.80             | 188.06             | 187.65              |
|          |         |                                                                  | exp <sup>11</sup> |                   |                    |                    | 189.5               |
|          |         | <sup>1</sup> <i>J<sub>CH</sub></i><br>( <i>CH</i> <sub>3</sub> ) | SOPPA             | 138.72            | 139.19             | 140.62             | 141.10              |
|          |         |                                                                  | HRPA(D)           | 138.60            | 139.08             | 140.47             | 140.96              |
|          |         |                                                                  | B3LYP             | 143.58            | 144.07             | 145.56             | 146.06              |
|          |         |                                                                  | BHandH            | 134.23            | 134.63             | 136.01             | 136.41              |

*Continued on next page*

Table S1 – *Continued from previous page*

| Molecule      | Solvent | SSCC                         | Method            | vacuum-<br>vacuum | vacuum-<br>solvent | solvent-<br>vacuum | solvent-<br>solvent |
|---------------|---------|------------------------------|-------------------|-------------------|--------------------|--------------------|---------------------|
|               |         |                              | PBE0              | 134.01            | 134.44             | 135.88             | 136.32              |
|               |         |                              | exp <sup>11</sup> |                   |                    |                    | 140.7               |
|               |         | <sup>1</sup> J <sub>CH</sub> | SOPPA             | 193.13            | 194.14             | 191.21             | 192.21              |
|               |         | (C4)                         | HRPA(D)           | 192.10            | 193.09             | 190.25             | 191.24              |
|               |         |                              | B3LYP             | 199.91            | 200.90             | 198.09             | 199.08              |
|               |         |                              | BHandH            | 186.15            | 187.14             | 184.44             | 185.43              |
|               |         |                              | PBE0              | 187.42            | 188.40             | 185.59             | 186.57              |
|               |         |                              | exp <sup>11</sup> |                   |                    |                    | 190.1               |
|               |         | <sup>2</sup> J <sub>CH</sub> | SOPPA             | 8.42              | 8.33               | 9.35               | 9.27                |
|               |         | (45)                         | HRPA(D)           | 8.37              | 8.27               | 9.22               | 9.13                |
|               |         |                              | B3LYP             | 10.20             | 10.09              | 11.19              | 11.09               |
|               |         |                              | BHandH            | 8.49              | 8.41               | 9.39               | 9.32                |
|               |         |                              | PBE0              | 8.94              | 8.84               | 9.91               | 9.82                |
|               |         |                              | exp <sup>11</sup> |                   |                    |                    | 10.3                |
|               |         | <sup>3</sup> J <sub>CH</sub> | SOPPA             | 11.63             | 11.48              | 11.37              | 11.21               |
|               |         | (42)                         | HRPA(D)           | 10.78             | 10.64              | 10.58              | 10.43               |
|               |         |                              | B3LYP             | 12.46             | 12.29              | 12.29              | 12.11               |
|               |         |                              | BHandH            | 12.40             | 12.24              | 12.17              | 12.00               |
|               |         |                              | PBE0              | 12.30             | 12.15              | 12.11              | 11.94               |
|               |         |                              | exp <sup>11</sup> |                   |                    |                    | 10.3                |
| Triethylamine |         | <sup>1</sup> J <sub>CH</sub> | SOPPA             | 138.72            | 138.97             | 139.71             | 139.96              |
|               |         | (CH <sub>3</sub> )           | HRPA(D)           | 138.60            | 138.85             | 139.57             | 139.83              |
|               |         |                              | B3LYP             | 143.58            | 143.83             | 144.60             | 144.86              |
|               |         |                              | BHandH            | 134.23            | 134.44             | 135.15             | 135.36              |
|               |         |                              | PBE0              | 134.01            | 134.24             | 134.98             | 135.21              |

*Continued on next page*

Table S1 – *Continued from previous page*

| Molecule              | Solvent  | SSCC                         | Method  | vacuum-<br>vacuum | vacuum-<br>solvent | solvent-<br>vacuum | solvent-<br>solvent |
|-----------------------|----------|------------------------------|---------|-------------------|--------------------|--------------------|---------------------|
|                       |          | exp <sup>11</sup>            |         |                   |                    |                    | 138.6               |
|                       |          | <sup>1</sup> J <sub>CH</sub> | SOPPA   | 193.13            | 193.69             | 192.28             | 192.83              |
|                       |          | (C4)                         | HRPA(D) | 192.10            | 192.64             | 191.28             | 191.83              |
|                       |          |                              | B3LYP   | 199.91            | 200.45             | 199.11             | 199.65              |
|                       |          |                              | BHandH  | 186.15            | 186.69             | 185.39             | 185.93              |
|                       |          |                              | PBE0    | 187.42            | 187.95             | 186.60             | 187.13              |
|                       |          | exp <sup>11</sup>            |         |                   |                    |                    | 187.9               |
| 1-methyl-<br>pyrazole | n-Hexane | <sup>1</sup> J <sub>CH</sub> | SOPPA   | 189.28            | 189.77             | 189.12             | 189.6               |
|                       |          | (C3)                         | HRPA(D) | 188.31            | 188.8              | 188.18             | 188.65              |
|                       |          |                              | B3LYP   | 195.74            | 196.13             | 195.47             | 195.85              |
|                       |          |                              | BHandH  | 183.01            | 183.38             | 182.76             | 183.12              |
|                       |          |                              | PBE0    | 183.64            | 184.03             | 183.37             | 183.75              |
|                       |          | exp <sup>11</sup>            |         |                   |                    |                    | 183.8               |
|                       |          | <sup>2</sup> J <sub>CH</sub> | SOPPA   | 5.22              | 5.20               | 5.43               | 5.41                |
|                       |          | (C3)                         | HRPA(D) | 5.09              | 5.06               | 5.28               | 5.26                |
|                       |          |                              | B3LYP   | 6.39              | 6.37               | 6.60               | 6.58                |
|                       |          |                              | BHandH  | 4.95              | 4.93               | 5.15               | 5.13                |
|                       |          |                              | PBE0    | 5.23              | 5.21               | 5.44               | 5.42                |
|                       |          | exp <sup>11</sup>            |         |                   |                    |                    | 5.7                 |
|                       |          | <sup>3</sup> J <sub>CH</sub> | SOPPA   | 8.49              | 8.49               | 8.47               | 8.48                |
|                       |          | (C3)                         | HRPA(D) | 7.81              | 7.81               | 7.81               | 7.81                |
|                       |          |                              | B3LYP   | 8.80              | 8.78               | 8.81               | 8.79                |
|                       |          |                              | BHandH  | 8.72              | 8.70               | 8.73               | 8.71                |
|                       |          |                              | PBE0    | 8.82              | 8.80               | 8.82               | 8.80                |
|                       |          | exp <sup>11</sup>            |         |                   |                    |                    | 8.3                 |

*Continued on next page*

Table S1 – *Continued from previous page*

| Molecule | Solvent | SSCC       | Method            | vacuum- | vacuum- | solvent- | solvent- |
|----------|---------|------------|-------------------|---------|---------|----------|----------|
|          |         |            |                   | vacuum  | solvent | vacuum   | solvent  |
|          |         | $^1J_{CH}$ | SOPPA             | 178.16  | 178.15  | 178.90   | 178.90   |
|          |         | (C4)       | HRPA(D)           | 177.61  | 177.60  | 178.35   | 178.34   |
|          |         |            | B3LYP             | 185.10  | 185.12  | 185.86   | 185.89   |
|          |         |            | BHandH            | 173.24  | 173.28  | 173.90   | 173.96   |
|          |         |            | PBE0              | 174.08  | 174.11  | 174.79   | 174.82   |
|          |         |            | exp <sup>11</sup> |         |         |          | 174.8    |
|          |         | $^2J_{CH}$ | SOPPA             | 10.79   | 10.76   | 10.66    | 10.63    |
|          |         | (43)       | HRPA(D)           | 10.43   | 10.40   | 10.31    | 10.28    |
|          |         |            | B3LYP             | 12.12   | 12.09   | 11.99    | 11.97    |
|          |         |            | BHandH            | 10.63   | 10.60   | 10.52    | 10.49    |
|          |         |            | PBE0              | 10.87   | 10.85   | 10.77    | 10.74    |
|          |         |            | exp <sup>11</sup> |         |         |          | 10.5     |
|          |         | $^2J_{CH}$ | SOPPA             | 7.80    | 7.84    | 7.94     | 7.98     |
|          |         | (45)       | HRPA(D)           | 7.58    | 7.62    | 7.71     | 7.75     |
|          |         |            | B3LYP             | 9.30    | 9.32    | 9.45     | 9.47     |
|          |         |            | BHandH            | 7.51    | 7.54    | 7.67     | 7.70     |
|          |         |            | PBE0              | 8.16    | 8.18    | 8.31     | 8.34     |
|          |         |            | exp <sup>11</sup> |         |         |          | 9.0      |
|          |         | $^1J_{CH}$ | SOPPA             | 188.54  | 188.34  | 190.83   | 190.64   |
|          |         | (C5)       | HRPA(D)           | 188.07  | 187.87  | 190.33   | 190.14   |
|          |         |            | B3LYP             | 193.28  | 193.00  | 195.54   | 195.26   |
|          |         |            | BHandH            | 180.05  | 179.86  | 182.11   | 181.93   |
|          |         |            | PBE0              | 181.15  | 180.91  | 183.31   | 183.08   |
|          |         |            | exp <sup>11</sup> |         |         |          | 184.9    |
|          |         | $^1J_{CH}$ | SOPPA             | 139.39  | 139.53  | 139.92   | 140.06   |

*Continued on next page*

Table S1 – *Continued from previous page*

| Molecule | Solvent    | SSCC                         | Method            | vacuum-<br>vacuum | vacuum-<br>solvent | solvent-<br>vacuum | solvent-<br>solvent |
|----------|------------|------------------------------|-------------------|-------------------|--------------------|--------------------|---------------------|
|          |            | (CH <sub>3</sub> )           | HRPA(D)           | 139.23            | 139.36             | 139.75             | 139.89              |
|          |            |                              | B3LYP             | 144.21            | 144.33             | 144.79             | 144.91              |
|          |            |                              | BHandH            | 134.84            | 134.93             | 135.35             | 135.45              |
|          |            |                              | PBE0              | 134.61            | 134.71             | 135.15             | 135.25              |
|          |            |                              | exp <sup>11</sup> |                   |                    |                    | 140.6               |
|          |            | <sup>1</sup> J <sub>CH</sub> | SOPPA             | 189.28            | 190.14             | 188.82             | 189.67              |
|          |            |                              | (C3)              | HRPA(D)           | 188.31             | 189.15             | 187.90              |
|          |            |                              | B3LYP             | 195.74            | 196.47             | 195.06             | 195.77              |
|          |            |                              | BHandH            | 183.01            | 183.68             | 182.39             | 183.05              |
|          |            |                              | PBE0              | 183.64            | 184.29             | 182.96             | 183.60              |
|          |            |                              | exp <sup>11</sup> |                   |                    |                    | 184.7               |
|          | Chloroform | <sup>2</sup> J <sub>CH</sub> | SOPPA             | 5.22              | 5.17               | 5.61               | 5.56                |
|          |            |                              | (C3)              | HRPA(D)           | 5.09               | 5.03               | 5.45                |
|          |            |                              | B3LYP             | 6.39              | 6.35               | 6.77               | 6.74                |
|          |            |                              | BHandH            | 4.95              | 4.92               | 5.32               | 5.30                |
|          |            |                              | PBE0              | 5.23              | 5.21               | 5.61               | 5.59                |
|          |            |                              | exp <sup>11</sup> |                   |                    |                    | 5.7                 |
|          |            | <sup>3</sup> J <sub>CH</sub> | SOPPA             | 8.49              | 8.48               | 8.47               | 8.47                |
|          |            |                              | (C3)              | HRPA(D)           | 7.81               | 7.81               | 7.82                |
|          |            |                              | B3LYP             | 8.80              | 8.76               | 8.84               | 8.79                |
|          |            |                              | BHandH            | 8.72              | 8.68               | 8.74               | 8.70                |
|          |            |                              | PBE0              | 8.82              | 8.78               | 8.84               | 8.80                |
|          |            |                              | exp <sup>11</sup> |                   |                    |                    | 8.3                 |
|          |            | <sup>1</sup> J <sub>CH</sub> | SOPPA             | 178.16            | 178.04             | 179.55             | 179.39              |
|          |            |                              | (C4)              | HRPA(D)           | 177.61             | 177.50             | 178.98              |
|          |            |                              |                   |                   |                    | 178.98             | 178.82              |

*Continued on next page*



Table S1 – *Continued from previous page*

| Molecule | Solvent | SSCC                                                             | Method            | vacuum-<br>vacuum | vacuum-<br>solvent | solvent-<br>vacuum | solvent-<br>solvent |
|----------|---------|------------------------------------------------------------------|-------------------|-------------------|--------------------|--------------------|---------------------|
|          |         |                                                                  | B3LYP             | 185.10            | 185.11             | 186.52             | 186.50              |
|          |         |                                                                  | BHandH            | 173.24            | 173.31             | 174.47             | 174.52              |
|          |         |                                                                  | PBE0              | 174.08            | 174.14             | 175.39             | 175.43              |
|          |         |                                                                  | exp <sup>11</sup> |                   |                    |                    | 175.4               |
|          |         | <sup>2</sup> <i>J<sub>CH</sub></i><br>(43)                       | SOPPA             | 10.79             | 10.74              | 10.55              | 10.50               |
|          |         |                                                                  | HRPA(D)           | 10.43             | 10.38              | 10.20              | 10.16               |
|          |         |                                                                  | B3LYP             | 12.12             | 12.08              | 11.88              | 11.84               |
|          |         |                                                                  | BHandH            | 10.63             | 10.58              | 10.42              | 10.37               |
|          |         |                                                                  | PBE0              | 10.87             | 10.83              | 10.67              | 10.63               |
|          |         |                                                                  | exp <sup>11</sup> |                   |                    |                    | 10.2                |
|          |         | <sup>2</sup> <i>J<sub>CH</sub></i><br>(45)                       | SOPPA             | 7.80              | 7.89               | 8.03               | 8.13                |
|          |         |                                                                  | HRPA(D)           | 7.58              | 7.66               | 7.80               | 7.89                |
|          |         |                                                                  | B3LYP             | 9.30              | 9.33               | 9.56               | 9.60                |
|          |         |                                                                  | BHandH            | 7.51              | 7.55               | 7.79               | 7.84                |
|          |         |                                                                  | PBE0              | 8.16              | 8.20               | 8.43               | 8.47                |
|          |         |                                                                  | exp <sup>11</sup> |                   |                    |                    | 8.9                 |
|          |         | <sup>1</sup> <i>J<sub>CH</sub></i><br>( <i>C</i> 5)              | SOPPA             | 188.54            | 188.14             | 192.82             | 192.48              |
|          |         |                                                                  | HRPA(D)           | 188.07            | 187.68             | 192.29             | 191.95              |
|          |         |                                                                  | B3LYP             | 193.28            | 192.72             | 197.53             | 197.02              |
|          |         |                                                                  | BHandH            | 180.05            | 179.74             | 183.90             | 183.65              |
|          |         |                                                                  | PBE0              | 181.15            | 180.74             | 185.20             | 184.86              |
|          |         |                                                                  | exp <sup>11</sup> |                   |                    |                    | 186.3               |
|          |         | <sup>1</sup> <i>J<sub>CH</sub></i><br>( <i>CH</i> <sub>3</sub> ) | SOPPA             | 139.39            | 139.63             | 140.35             | 140.60              |
|          |         |                                                                  | HRPA(D)           | 139.23            | 139.47             | 140.17             | 140.42              |
|          |         |                                                                  | B3LYP             | 144.21            | 144.40             | 145.27             | 145.47              |

*Continued on next page*

Table S1 – *Continued from previous page*

| Molecule | Solvent  | SSCC                                                | Method            | vacuum-<br>vacuum | vacuum-<br>solvent | solvent-<br>vacuum | solvent-<br>solvent |
|----------|----------|-----------------------------------------------------|-------------------|-------------------|--------------------|--------------------|---------------------|
|          | Pyridine |                                                     | BHandH            | 134.84            | 134.99             | 135.77             | 135.93              |
|          |          |                                                     | PBE0              | 134.61            | 134.78             | 135.60             | 135.79              |
|          |          |                                                     | exp <sup>11</sup> |                   |                    |                    | 139.6               |
|          |          | <sup>1</sup> <i>J<sub>CH</sub></i><br>( <i>C3</i> ) | SOPPA             | 189.28            | 190.31             | 188.65             | 189.67              |
|          |          |                                                     | HRPA(D)           | 188.31            | 189.32             | 187.73             | 188.74              |
|          |          |                                                     | B3LYP             | 195.74            | 196.60             | 194.83             | 195.67              |
|          |          |                                                     | BHandH            | 183.01            | 183.80             | 182.18             | 182.96              |
|          |          |                                                     | PBE0              | 183.64            | 184.43             | 182.74             | 183.51              |
|          |          |                                                     | exp <sup>11</sup> |                   |                    |                    | 183.7               |
|          |          | <sup>2</sup> <i>J<sub>CH</sub></i><br>( <i>C3</i> ) | SOPPA             | 5.22              | 5.16               | 5.68               | 5.63                |
|          |          |                                                     | HRPA(D)           | 5.09              | 5.03               | 5.52               | 5.46                |
|          |          |                                                     | B3LYP             | 6.39              | 6.35               | 6.85               | 6.81                |
|          |          |                                                     | BHandH            | 4.95              | 4.92               | 5.39               | 5.37                |
|          |          |                                                     | PBE0              | 5.23              | 5.20               | 5.68               | 5.66                |
|          |          |                                                     | exp <sup>11</sup> |                   |                    |                    | 5.7                 |
|          |          | <sup>3</sup> <i>J<sub>CH</sub></i><br>( <i>C3</i> ) | SOPPA             | 8.49              | 8.48               | 8.47               | 8.47                |
|          |          |                                                     | HRPA(D)           | 7.81              | 7.80               | 7.83               | 7.82                |
|          |          |                                                     | B3LYP             | 8.80              | 8.75               | 8.85               | 8.79                |
|          |          |                                                     | BHandH            | 8.72              | 8.67               | 8.75               | 8.70                |
|          |          |                                                     | PBE0              | 8.82              | 8.77               | 8.85               | 8.80                |
|          |          |                                                     | exp <sup>11</sup> |                   |                    |                    | 8.3                 |
|          |          | <sup>1</sup> <i>J<sub>CH</sub></i><br>( <i>C4</i> ) | SOPPA             | 178.16            | 178.03             | 179.83             | 179.65              |
|          |          |                                                     | HRPA(D)           | 177.61            | 177.48             | 179.26             | 179.08              |
|          |          |                                                     | B3LYP             | 185.10            | 185.11             | 186.81             | 186.79              |
|          |          |                                                     | BHandH            | 173.24            | 173.31             | 174.73             | 174.79              |

*Continued on next page*

Table S1 – *Continued from previous page*

| Molecule | Solvent | SSCC                         | Method            | vacuum-<br>vacuum | vacuum-<br>solvent | solvent-<br>vacuum | solvent-<br>solvent |
|----------|---------|------------------------------|-------------------|-------------------|--------------------|--------------------|---------------------|
|          |         |                              | PBE0              | 174.08            | 174.14             | 175.66             | 175.70              |
|          |         |                              | exp <sup>11</sup> |                   |                    |                    | 175.5               |
|          |         | <sup>2</sup> J <sub>CH</sub> | SOPPA             | 10.79             | 10.73              | 10.49              | 10.43               |
|          |         | (43)                         | HRPA(D)           | 10.43             | 10.38              | 10.15              | 10.10               |
|          |         |                              | B3LYP             | 12.12             | 12.07              | 11.82              | 11.77               |
|          |         |                              | BHandH            | 10.63             | 10.57              | 10.37              | 10.31               |
|          |         |                              | PBE0              | 10.87             | 10.82              | 10.62              | 10.58               |
|          |         |                              | exp <sup>11</sup> |                   |                    |                    | 10.6                |
|          |         | <sup>2</sup> J <sub>CH</sub> | SOPPA             | 7.80              | 7.90               | 8.07               | 8.18                |
|          |         | (45)                         | HRPA(D)           | 7.58              | 7.67               | 7.84               | 7.94                |
|          |         |                              | B3LYP             | 9.30              | 9.34               | 9.60               | 9.66                |
|          |         |                              | BHandH            | 7.51              | 7.56               | 7.84               | 7.89                |
|          |         |                              | PBE0              | 8.16              | 8.21               | 8.47               | 8.53                |
|          |         |                              | exp <sup>11</sup> |                   |                    |                    | 8.9                 |
|          |         | <sup>1</sup> J <sub>CH</sub> | SOPPA             | 188.54            | 188.05             | 193.70             | 193.28              |
|          |         | (C5)                         | HRPA(D)           | 188.07            | 187.58             | 193.15             | 192.74              |
|          |         |                              | B3LYP             | 193.28            | 192.61             | 198.43             | 197.83              |
|          |         |                              | BHandH            | 180.05            | 179.68             | 184.70             | 184.40              |
|          |         |                              | PBE0              | 181.15            | 180.66             | 186.05             | 185.64              |
|          |         |                              | exp <sup>11</sup> |                   |                    |                    | 186.4               |
|          |         | <sup>1</sup> J <sub>CH</sub> | SOPPA             | 139.39            | 139.68             | 140.53             | 140.82              |
|          |         | (CH <sub>3</sub> )           | HRPA(D)           | 139.23            | 139.51             | 140.35             | 140.65              |
|          |         |                              | B3LYP             | 144.21            | 144.44             | 145.48             | 145.73              |
|          |         |                              | BHandH            | 134.84            | 135.02             | 135.95             | 136.15              |
|          |         |                              | PBE0              | 134.61            | 134.81             | 135.79             | 136.02              |

*Continued on next page*

Table S1 – *Continued from previous page*

| Molecule | Solvent | SSCC                         | Method  | vacuum-<br>vacuum | vacuum-<br>solvent | solvent-<br>vacuum | solvent-<br>solvent |
|----------|---------|------------------------------|---------|-------------------|--------------------|--------------------|---------------------|
|          | Acetone | exp <sup>11</sup>            |         |                   |                    |                    | 139.3               |
|          |         | <sup>1</sup> J <sub>CH</sub> | SOPPA   | 189.28            | 190.35             | 188.60             | 189.66              |
|          |         | (C3)                         | HRPA(D) | 188.31            | 189.36             | 187.69             | 188.73              |
|          |         |                              | B3LYP   | 195.74            | 196.62             | 194.77             | 195.64              |
|          |         |                              | BHandH  | 183.01            | 183.83             | 182.13             | 182.93              |
|          |         |                              | PBE0    | 183.64            | 184.46             | 182.68             | 183.48              |
|          |         | exp <sup>11</sup>            |         |                   |                    |                    | 183.7               |
|          |         | <sup>2</sup> J <sub>CH</sub> | SOPPA   | 5.22              | 5.16               | 5.70               | 5.64                |
|          |         | (C3)                         | HRPA(D) | 5.09              | 5.03               | 5.54               | 5.48                |
|          |         |                              | B3LYP   | 6.39              | 6.35               | 6.86               | 6.83                |
|          |         |                              | BHandH  | 4.95              | 4.92               | 5.41               | 5.38                |
|          |         |                              | PBE0    | 5.23              | 5.20               | 5.70               | 5.68                |
|          |         | exp <sup>11</sup>            |         |                   |                    |                    | 5.7                 |
|          |         | <sup>3</sup> J <sub>CH</sub> | SOPPA   | 8.49              | 8.48               | 8.47               | 8.47                |
|          |         | (C3)                         | HRPA(D) | 7.81              | 7.80               | 7.83               | 7.82                |
|          |         |                              | B3LYP   | 8.80              | 8.74               | 8.85               | 8.79                |
|          |         |                              | BHandH  | 8.72              | 8.67               | 8.76               | 8.70                |
|          |         |                              | PBE0    | 8.82              | 8.77               | 8.85               | 8.80                |
|          |         | exp <sup>11</sup>            |         |                   |                    |                    | 8.3                 |
|          |         | <sup>1</sup> J <sub>CH</sub> | SOPPA   | 178.16            | 178.02             | 179.90             | 179.71              |
|          |         | (C4)                         | HRPA(D) | 177.61            | 177.48             | 179.33             | 179.14              |
|          |         |                              | B3LYP   | 185.10            | 185.11             | 186.88             | 186.86              |
|          |         |                              | BHandH  | 173.24            | 173.32             | 174.79             | 174.85              |
|          |         |                              | PBE0    | 174.08            | 174.13             | 175.72             | 175.76              |
|          |         | exp <sup>11</sup>            |         |                   |                    |                    | 175.3               |

*Continued on next page*

Table S1 – *Continued from previous page*

| Molecule | Solvent | SSCC               | Method            | vacuum-<br>vacuum | vacuum-<br>solvent | solvent-<br>vacuum | solvent-<br>solvent |
|----------|---------|--------------------|-------------------|-------------------|--------------------|--------------------|---------------------|
|          |         | $^2J_{CH}$         | SOPPA             | 10.79             | 10.73              | 10.48              | 10.42               |
|          |         | (43)               | HRPA(D)           | 10.43             | 10.37              | 10.14              | 10.08               |
|          |         |                    | B3LYP             | 12.12             | 12.06              | 11.81              | 11.76               |
|          |         |                    | BHandH            | 10.63             | 10.57              | 10.36              | 10.30               |
|          |         |                    | PBE0              | 10.87             | 10.82              | 10.61              | 10.56               |
|          |         |                    | exp <sup>11</sup> |                   |                    |                    | 10.5                |
|          |         | $^2J_{CH}$         | SOPPA             | 7.80              | 7.90               | 8.08               | 8.19                |
|          |         | (45)               | HRPA(D)           | 7.58              | 7.67               | 7.84               | 7.95                |
|          |         |                    | B3LYP             | 9.30              | 9.34               | 9.61               | 9.67                |
|          |         |                    | BHandH            | 7.51              | 7.56               | 7.85               | 7.90                |
|          |         |                    | PBE0              | 8.16              | 8.21               | 8.48               | 8.54                |
|          |         |                    | exp <sup>11</sup> |                   |                    |                    | 9.1                 |
|          |         | $^1J_{CH}$         | SOPPA             | 188.54            | 188.03             | 193.91             | 193.47              |
|          |         | (C5)               | HRPA(D)           | 188.07            | 187.56             | 193.36             | 192.93              |
|          |         |                    | B3LYP             | 193.28            | 192.59             | 198.64             | 198.03              |
|          |         |                    | BHandH            | 180.05            | 179.66             | 184.89             | 184.58              |
|          |         |                    | PBE0              | 181.15            | 180.64             | 186.26             | 185.82              |
|          |         |                    | exp <sup>11</sup> |                   |                    |                    | 186.7               |
|          |         | $^1J_{CH}$         | SOPPA             | 139.39            | 139.68             | 140.57             | 140.88              |
|          |         | (CH <sub>3</sub> ) | HRPA(D)           | 139.23            | 139.52             | 140.39             | 140.70              |
|          |         |                    | B3LYP             | 144.21            | 144.45             | 145.53             | 145.78              |
|          |         |                    | BHandH            | 134.84            | 135.03             | 135.99             | 136.19              |
|          |         |                    | PBE0              | 134.61            | 134.82             | 135.84             | 136.07              |
|          |         |                    | exp <sup>11</sup> |                   |                    |                    | 139.7               |
|          | DMSO    | $^1J_{CH}$         | SOPPA             | 189.28            | 190.38             | 188.56             | 189.65              |

*Continued on next page*

Table S1 – *Continued from previous page*

| Molecule | Solvent | SSCC                         | Method            | vacuum-<br>vacuum | vacuum-<br>solvent | solvent-<br>vacuum | solvent-<br>solvent |
|----------|---------|------------------------------|-------------------|-------------------|--------------------|--------------------|---------------------|
|          |         | (C3)                         | HRPA(D)           | 188.31            | 189.40             | 187.65             | 188.72              |
|          |         |                              | B3LYP             | 195.74            | 196.65             | 194.71             | 195.61              |
|          |         |                              | BHandH            | 183.01            | 183.86             | 182.08             | 182.91              |
|          |         |                              | PBE0              | 183.64            | 184.48             | 182.63             | 183.45              |
|          |         |                              | exp <sup>11</sup> |                   |                    |                    | 183.8               |
|          |         | <sup>2</sup> J <sub>CH</sub> | SOPPA             | 5.22              | 5.16               | 5.72               | 5.66                |
|          |         | (C3)                         | HRPA(D)           | 5.09              | 5.02               | 5.55               | 5.50                |
|          |         |                              | B3LYP             | 6.39              | 6.35               | 6.88               | 6.85                |
|          |         |                              | BHandH            | 4.95              | 4.92               | 5.42               | 5.40                |
|          |         |                              | PBE0              | 5.23              | 5.20               | 5.72               | 5.69                |
|          |         |                              | exp <sup>11</sup> |                   |                    |                    | 5.7                 |
|          |         | <sup>3</sup> J <sub>CH</sub> | SOPPA             | 8.49              | 8.48               | 8.48               | 8.47                |
|          |         | (C3)                         | HRPA(D)           | 7.81              | 7.80               | 7.83               | 7.82                |
|          |         |                              | B3LYP             | 8.80              | 8.74               | 8.85               | 8.79                |
|          |         |                              | BHandH            | 8.72              | 8.66               | 8.76               | 8.70                |
|          |         |                              | PBE0              | 8.82              | 8.77               | 8.85               | 8.80                |
|          |         |                              | exp <sup>11</sup> |                   |                    |                    | 8.3                 |
|          |         | <sup>1</sup> J <sub>CH</sub> | SOPPA             | 178.16            | 178.02             | 179.97             | 179.77              |
|          |         | (C4)                         | HRPA(D)           | 177.61            | 177.47             | 179.40             | 179.20              |
|          |         |                              | B3LYP             | 185.10            | 185.11             | 186.95             | 186.93              |
|          |         |                              | BHandH            | 173.24            | 173.32             | 174.84             | 174.91              |
|          |         |                              | PBE0              | 174.08            | 174.13             | 175.78             | 175.82              |
|          |         |                              | exp <sup>11</sup> |                   |                    |                    | 175.7               |
|          |         | <sup>2</sup> J <sub>CH</sub> | SOPPA             | 10.79             | 10.73              | 10.47              | 10.40               |
|          |         | (43)                         | HRPA(D)           | 10.43             | 10.37              | 10.13              | 10.07               |

*Continued on next page*

Table S1 – *Continued from previous page*

| Molecule | Solvent | SSCC                                                             | Method            | vacuum-<br>vacuum | vacuum-<br>solvent | solvent-<br>vacuum | solvent-<br>solvent |
|----------|---------|------------------------------------------------------------------|-------------------|-------------------|--------------------|--------------------|---------------------|
|          |         |                                                                  | B3LYP             | 12.12             | 12.06              | 11.80              | 11.74               |
|          |         |                                                                  | BHandH            | 10.63             | 10.56              | 10.35              | 10.29               |
|          |         |                                                                  | PBE0              | 10.87             | 10.82              | 10.60              | 10.55               |
|          |         |                                                                  | exp <sup>11</sup> |                   |                    |                    | 9.9                 |
|          |         | <sup>2</sup> <i>J<sub>CH</sub></i><br>(45)                       | SOPPA             | 7.80              | 7.90               | 8.08               | 8.20                |
|          |         |                                                                  | HRPA(D)           | 7.58              | 7.68               | 7.85               | 7.96                |
|          |         |                                                                  | B3LYP             | 9.30              | 9.34               | 9.62               | 9.68                |
|          |         |                                                                  | BHandH            | 7.51              | 7.56               | 7.86               | 7.91                |
|          |         |                                                                  | PBE0              | 8.16              | 8.21               | 8.49               | 8.55                |
|          |         |                                                                  | exp <sup>11</sup> |                   |                    |                    | 9.4                 |
|          |         | <sup>1</sup> <i>J<sub>CH</sub></i><br>( <i>C</i> 5)              | SOPPA             | 188.54            | 188.01             | 194.11             | 193.66              |
|          |         |                                                                  | HRPA(D)           | 188.07            | 187.55             | 193.56             | 193.11              |
|          |         |                                                                  | B3LYP             | 193.28            | 192.57             | 198.85             | 198.21              |
|          |         |                                                                  | BHandH            | 180.05            | 179.65             | 185.08             | 184.76              |
|          |         |                                                                  | PBE0              | 181.15            | 180.62             | 186.45             | 186.00              |
|          |         |                                                                  | exp <sup>11</sup> |                   |                    |                    | 186.0               |
|          |         | <sup>1</sup> <i>J<sub>CH</sub></i><br>( <i>CH</i> <sub>3</sub> ) | SOPPA             | 139.39            | 139.70             | 140.61             | 140.93              |
|          |         |                                                                  | HRPA(D)           | 139.23            | 139.53             | 140.43             | 140.75              |
|          |         |                                                                  | B3LYP             | 144.21            | 144.46             | 145.57             | 145.84              |
|          |         |                                                                  | BHandH            | 134.84            | 135.03             | 136.03             | 136.24              |
|          |         |                                                                  | PBE0              | 134.61            | 134.83             | 135.88             | 136.13              |
|          |         |                                                                  | exp <sup>11</sup> |                   |                    |                    | 139.7               |
|          | Water   | <sup>1</sup> <i>J<sub>CH</sub></i><br>( <i>C</i> 3)              | SOPPA             | 189.28            | 190.40             | 188.54             | 189.65              |
|          |         |                                                                  | HRPA(D)           | 188.31            | 189.41             | 187.63             | 188.72              |
|          |         |                                                                  | B3LYP             | 195.74            | 196.66             | 194.70             | 195.60              |

*Continued on next page*

Table S1 – *Continued from previous page*

| Molecule | Solvent | SSCC                         | Method            | vacuum-<br>vacuum | vacuum-<br>solvent | solvent-<br>vacuum | solvent-<br>solvent |
|----------|---------|------------------------------|-------------------|-------------------|--------------------|--------------------|---------------------|
|          |         |                              | BHandH            | 183.01            | 183.86             | 182.06             | 182.90              |
|          |         |                              | PBE0              | 183.64            | 184.49             | 182.61             | 183.44              |
|          |         |                              | exp <sup>11</sup> |                   |                    |                    | 186.0               |
|          |         | <sup>2</sup> J <sub>CH</sub> | SOPPA             | 5.22              | 5.16               | 5.72               | 5.66                |
|          |         | (C3)                         | HRPA(D)           | 5.09              | 5.02               | 5.56               | 5.50                |
|          |         |                              | B3LYP             | 6.39              | 6.35               | 6.89               | 6.85                |
|          |         |                              | BHandH            | 4.95              | 4.92               | 5.43               | 5.41                |
|          |         |                              | PBE0              | 5.23              | 5.20               | 5.72               | 5.70                |
|          |         |                              | exp <sup>11</sup> |                   |                    |                    | 6.2                 |
|          |         | <sup>3</sup> J <sub>CH</sub> | SOPPA             | 8.49              | 8.48               | 8.48               | 8.47                |
|          |         | (C3)                         | HRPA(D)           | 7.81              | 7.80               | 7.83               | 7.82                |
|          |         |                              | B3LYP             | 8.80              | 8.74               | 8.85               | 8.79                |
|          |         |                              | BHandH            | 8.72              | 8.66               | 8.76               | 8.70                |
|          |         |                              | PBE0              | 8.82              | 8.77               | 8.85               | 8.80                |
|          |         |                              | exp <sup>11</sup> |                   |                    |                    | 8.0                 |
|          |         | <sup>1</sup> J <sub>CH</sub> | SOPPA             | 178.16            | 178.02             | 179.99             | 179.79              |
|          |         | (C4)                         | HRPA(D)           | 177.61            | 177.47             | 179.42             | 179.22              |
|          |         |                              | B3LYP             | 185.10            | 185.11             | 186.97             | 186.95              |
|          |         |                              | BHandH            | 173.24            | 173.32             | 174.86             | 174.93              |
|          |         |                              | PBE0              | 174.08            | 174.13             | 175.80             | 175.84              |
|          |         |                              | exp <sup>11</sup> |                   |                    |                    | 178.3               |
|          |         | <sup>2</sup> J <sub>CH</sub> | SOPPA             | 10.79             | 10.73              | 10.46              | 10.40               |
|          |         | (43)                         | HRPA(D)           | 10.43             | 10.37              | 10.12              | 10.06               |
|          |         |                              | B3LYP             | 12.12             | 12.06              | 11.79              | 11.74               |
|          |         |                              | BHandH            | 10.63             | 10.56              | 10.35              | 10.28               |

*Continued on next page*



Table S1 – *Continued from previous page*

| Molecule      | Solvent | SSCC                         | Method            | vacuum-<br>vacuum | vacuum-<br>solvent | solvent-<br>vacuum | solvent-<br>solvent |
|---------------|---------|------------------------------|-------------------|-------------------|--------------------|--------------------|---------------------|
|               |         |                              | PBE0              | 10.87             | 10.82              | 10.60              | 10.55               |
|               |         |                              | exp <sup>11</sup> |                   |                    |                    | 9.5                 |
|               |         | <sup>2</sup> J <sub>CH</sub> | SOPPA             | 7.80              | 7.90               | 8.09               | 8.20                |
|               |         | (45)                         | HRPA(D)           | 7.58              | 7.68               | 7.85               | 7.97                |
|               |         |                              | B3LYP             | 9.30              | 9.34               | 9.63               | 9.68                |
|               |         |                              | BHandH            | 7.51              | 7.56               | 7.86               | 7.92                |
|               |         |                              | PBE0              | 8.16              | 8.21               | 8.50               | 8.56                |
|               |         |                              | exp <sup>11</sup> |                   |                    |                    | 9.5                 |
|               |         | <sup>1</sup> J <sub>CH</sub> | SOPPA             | 188.54            | 188.00             | 194.17             | 193.72              |
|               |         | (C5)                         | HRPA(D)           | 188.07            | 187.54             | 193.62             | 193.17              |
|               |         |                              | B3LYP             | 193.28            | 192.56             | 198.91             | 198.27              |
|               |         |                              | BHandH            | 180.05            | 179.64             | 185.14             | 184.81              |
|               |         |                              | PBE0              | 181.15            | 180.61             | 186.51             | 186.06              |
|               |         |                              | exp <sup>11</sup> |                   |                    |                    | 186.6               |
|               |         | <sup>1</sup> J <sub>CH</sub> | SOPPA             | 139.39            | 139.70             | 140.63             | 140.94              |
|               |         | (Me)                         | HRPA(D)           | 139.23            | 139.54             | 140.44             | 140.77              |
|               |         |                              | B3LYP             | 144.21            | 144.46             | 145.58             | 145.86              |
|               |         |                              | BHandH            | 134.84            | 135.04             | 136.04             | 136.26              |
|               |         |                              | PBE0              | 134.61            | 134.83             | 135.90             | 136.14              |
|               |         |                              | exp <sup>11</sup> |                   |                    |                    | 140.9               |
| Triethylamine |         | <sup>1</sup> J <sub>CH</sub> | SOPPA             | 189.28            | 189.89             | 189.04             | 189.64              |
|               |         | (C3)                         | HRPA(D)           | 188.31            | 188.91             | 188.10             | 188.69              |
|               |         |                              | B3LYP             | 195.74            | 196.28             | 195.35             | 195.88              |
|               |         |                              | BHandH            | 183.01            | 183.50             | 182.65             | 183.14              |
|               |         |                              | PBE0              | 183.64            | 184.09             | 183.26             | 183.69              |

*Continued on next page*

Table S1 – *Continued from previous page*

| Molecule | Solvent | SSCC | Method                       | vacuum-<br>vacuum | vacuum-<br>solvent | solvent-<br>vacuum | solvent-<br>solvent |        |
|----------|---------|------|------------------------------|-------------------|--------------------|--------------------|---------------------|--------|
|          |         |      | exp <sup>11</sup>            |                   |                    |                    | 183.8               |        |
|          |         |      | <sup>2</sup> J <sub>CH</sub> | SOPPA             | 5.22               | 5.18               | 5.49                | 5.45   |
|          |         |      | (C3)                         | HRPA(D)           | 5.09               | 5.05               | 5.34                | 5.30   |
|          |         |      |                              | B3LYP             | 6.39               | 6.36               | 6.65                | 6.63   |
|          |         |      |                              | BHandH            | 4.95               | 4.93               | 5.20                | 5.19   |
|          |         |      |                              | PBE0              | 5.23               | 5.22               | 5.49                | 5.48   |
|          |         |      | exp <sup>11</sup>            |                   |                    |                    |                     | 5.6    |
|          |         |      | <sup>3</sup> J <sub>CH</sub> | SOPPA             | 8.49               | 8.48               | 8.47                | 8.47   |
|          |         |      | (C3)                         | HRPA(D)           | 7.81               | 7.81               | 7.82                | 7.81   |
|          |         |      |                              | B3LYP             | 8.80               | 8.77               | 8.82                | 8.79   |
|          |         |      |                              | BHandH            | 8.72               | 8.69               | 8.73                | 8.70   |
|          |         |      |                              | PBE0              | 8.82               | 8.79               | 8.83                | 8.80   |
|          |         |      | exp <sup>11</sup>            |                   |                    |                    |                     | 8.4    |
|          |         |      | <sup>1</sup> J <sub>CH</sub> | SOPPA             | 178.16             | 178.07             | 179.11              | 178.99 |
|          |         |      | (C4)                         | HRPA(D)           | 177.61             | 177.52             | 178.55              | 178.43 |
|          |         |      |                              | B3LYP             | 185.10             | 185.11             | 186.07              | 186.06 |
|          |         |      |                              | BHandH            | 173.24             | 173.29             | 174.08              | 174.12 |
|          |         |      |                              | PBE0              | 174.08             | 174.13             | 174.98              | 175.02 |
|          |         |      | exp <sup>11</sup>            |                   |                    |                    |                     | 174.7  |
|          |         |      | <sup>2</sup> J <sub>CH</sub> | SOPPA             | 10.79              | 10.76              | 10.63               | 10.59  |
|          |         |      | (43)                         | HRPA(D)           | 10.43              | 10.40              | 10.28               | 10.24  |
|          |         |      |                              | B3LYP             | 12.12              | 12.09              | 11.96               | 11.93  |
|          |         |      |                              | BHandH            | 10.63              | 10.60              | 10.49               | 10.46  |
|          |         |      |                              | PBE0              | 10.87              | 10.85              | 10.74               | 10.71  |
|          |         |      | exp <sup>11</sup>            |                   |                    |                    |                     | 10.6   |

*Continued on next page*

Table S1 – *Continued from previous page*

| Molecule               | Solvent    | SSCC               | Method             | vacuum-<br>vacuum | vacuum-<br>solvent | solvent-<br>vacuum | solvent-<br>solvent |
|------------------------|------------|--------------------|--------------------|-------------------|--------------------|--------------------|---------------------|
|                        |            | $^2J_{CH}$         | SOPPA              | 7.80              | 7.87               | 7.97               | 8.04                |
|                        |            | (45)               | HRPA(D)            | 7.58              | 7.64               | 7.74               | 7.81                |
|                        |            |                    | B3LYP              | 9.30              | 9.32               | 9.48               | 9.52                |
|                        |            |                    | BHandH             | 7.51              | 7.54               | 7.71               | 7.75                |
|                        |            |                    | PBE0               | 8.16              | 8.18               | 8.35               | 8.38                |
|                        |            |                    | exp <sup>11</sup>  |                   |                    |                    | 8.9                 |
|                        |            | $^1J_{CH}$         | SOPPA              | 188.54            | 188.27             | 191.47             | 191.24              |
|                        |            | (C5)               | HRPA(D)            | 188.07            | 187.81             | 190.96             | 190.74              |
|                        |            |                    | B3LYP              | 193.28            | 192.87             | 196.18             | 195.80              |
|                        |            |                    | BHandH             | 180.05            | 179.84             | 182.68             | 182.51              |
|                        |            |                    | PBE0               | 181.15            | 180.87             | 183.91             | 183.67              |
|                        |            |                    | exp <sup>11</sup>  |                   |                    |                    | 184.3               |
|                        |            | $^1J_{CH}$         | SOPPA              | 139.39            | 139.57             | 140.07             | 140.24              |
|                        |            | (CH <sub>3</sub> ) | HRPA(D)            | 139.23            | 139.41             | 139.89             | 140.07              |
|                        |            |                    | B3LYP              | 144.21            | 144.34             | 144.95             | 145.09              |
|                        |            |                    | BHandH             | 134.84            | 134.95             | 135.49             | 135.60              |
|                        |            |                    | PBE0               | 134.61            | 134.73             | 135.29             | 135.43              |
|                        |            |                    | exp <sup>11</sup>  |                   |                    |                    | 138.6               |
| 2-methyl-<br>aziridine | Chloroform | $^3J_{HH}$         | SOPPA              | 6.34              | 6.34               | 6.45               | 6.45                |
|                        |            | <i>cis</i>         | HRPA(D)            | 6.19              | 6.18               | 6.29               | 6.29                |
|                        |            |                    | B3LYP              | 6.94              | 6.96               | 7.08               | 7.10                |
|                        |            |                    | BHandH             | 7.04              | 7.06               | 7.17               | 7.19                |
|                        |            |                    | PBE0               | 6.61              | 6.63               | 6.75               | 6.76                |
|                        |            |                    | exp <sup>12a</sup> |                   |                    |                    | 5.5                 |
|                        |            | $^3J_{HH}$         | SOPPA              | 2.96              | 3.03               | 3.04               | 3.10                |

*Continued on next page*

Table S1 – *Continued from previous page*

| Molecule     | Solvent | SSCC                               | Method               | vacuum-<br>vacuum | vacuum-<br>solvent | solvent-<br>vacuum | solvent-<br>solvent |
|--------------|---------|------------------------------------|----------------------|-------------------|--------------------|--------------------|---------------------|
|              |         | <i>trans</i>                       | HRPA(D)              | 2.89              | 2.95               | 2.96               | 3.02                |
|              |         |                                    | B3LYP                | 3.33              | 3.43               | 3.43               | 3.53                |
|              |         |                                    | BHandH               | 2.94              | 3.02               | 3.03               | 3.11                |
|              |         |                                    | PBE0                 | 3.02              | 3.10               | 3.11               | 3.20                |
|              |         |                                    | exp <sup>12a</sup>   |                   |                    |                    | 3.5                 |
| Spiropentane | Benzene | <sup>2</sup> <i>J<sub>HH</sub></i> | SOPPA                | -6.20             | -6.14              | -6.18              | -6.12               |
|              |         |                                    | HRPA(D)              | -5.93             | -5.87              | -5.91              | -5.85               |
|              |         |                                    | B3LYP                | -4.31             | -4.24              | -4.29              | -4.22               |
|              |         |                                    | BHandH               | -5.04             | -4.98              | -5.04              | -4.97               |
|              |         |                                    | PBE0                 | -5.29             | -5.23              | -5.29              | -5.23               |
|              |         |                                    | exp <sup>13</sup>    |                   |                    |                    | -3.9                |
|              |         | <sup>3</sup> <i>J<sub>HH</sub></i> | SOPPA                | 4.93              | 4.92               | 4.94               | 4.93                |
|              |         |                                    | <i>trans</i> HRPA(D) | 4.69              | 4.68               | 4.70               | 4.69                |
|              |         |                                    | B3LYP                | 5.58              | 5.57               | 5.60               | 5.58                |
|              |         |                                    | BHandH               | 5.56              | 5.54               | 5.57               | 5.56                |
|              |         |                                    | PBE0                 | 5.43              | 5.41               | 5.44               | 5.43                |
|              |         |                                    | exp <sup>13</sup>    |                   |                    |                    | 5.2                 |
|              |         | <sup>3</sup> <i>J<sub>HH</sub></i> | SOPPA                | 9.12              | 9.09               | 9.14               | 9.11                |
|              |         |                                    | <i>cis</i> HRPA(D)   | 8.75              | 8.73               | 8.77               | 8.74                |
|              |         |                                    | B3LYP                | 10.03             | 10.00              | 10.06              | 10.03               |
|              |         |                                    | BHandH               | 10.39             | 10.36              | 10.43              | 10.39               |
|              |         |                                    | PBE0                 | 9.74              | 9.71               | 9.78               | 9.75                |
|              |         |                                    | exp <sup>13</sup>    |                   |                    |                    | 8.9                 |
| Spirohexane  | Benzene | <sup>2</sup> <i>J<sub>HH</sub></i> | SOPPA                | -6.79             | -6.67              | -6.70              | -6.59               |
|              |         |                                    | HRPA(D)              | -6.53             | -6.42              | -6.45              | -6.34               |

*Continued on next page*

Table S1 – *Continued from previous page*

| Molecule                      | Solvent | SSCC                         | Method                       | vacuum-<br>vacuum | vacuum-<br>solvent | solvent-<br>vacuum | solvent-<br>solvent |
|-------------------------------|---------|------------------------------|------------------------------|-------------------|--------------------|--------------------|---------------------|
|                               |         |                              | B3LYP                        | -5.23             | -5.11              | -5.15              | -5.03               |
|                               |         |                              | BHandH                       | -5.92             | -5.81              | -5.85              | -5.73               |
|                               |         |                              | PBE0                         | -6.25             | -6.14              | -6.18              | -6.06               |
|                               |         |                              | exp <sup>13</sup>            |                   |                    |                    | -4.6                |
|                               |         |                              | <sup>3</sup> J <sub>HH</sub> | SOPPA             | 5.71               | 5.69               | 5.72                |
|                               |         |                              | <i>trans</i>                 | HRPA(D)           | 5.41               | 5.39               | 5.42                |
|                               |         |                              |                              | B3LYP             | 6.70               | 6.67               | 6.71                |
|                               |         |                              |                              | BHandH            | 6.53               | 6.50               | 6.54                |
|                               |         |                              |                              | PBE0              | 6.46               | 6.43               | 6.47                |
|                               |         |                              |                              | exp <sup>13</sup> |                    |                    | 6.3                 |
|                               |         |                              | <sup>3</sup> J <sub>HH</sub> | SOPPA             | 10.02              | 9.98               | 10.03               |
|                               |         |                              | <i>cis</i>                   | HRPA(D)           | 9.57               | 9.52               | 9.58                |
|                               |         |                              |                              | B3LYP             | 11.23              | 11.18              | 11.26               |
|                               |         |                              |                              | BHandH            | 11.48              | 11.43              | 11.51               |
|                               |         |                              |                              | PBE0              | 10.86              | 10.81              | 10.89               |
|                               |         |                              |                              | exp <sup>13</sup> |                    |                    | 9.7                 |
| 1,1-dimethyl-<br>cyclopropane | Benzene | <sup>2</sup> J <sub>HH</sub> | SOPPA                        | -6.26             | -6.14              | -6.17              | -6.04               |
|                               |         |                              | HRPA(D)                      | -6.09             | -5.96              | -5.99              | -5.87               |
|                               |         |                              | B3LYP                        | -4.71             | -4.57              | -4.61              | -4.47               |
|                               |         |                              | BHandH                       | -5.16             | -5.03              | -5.07              | -4.94               |
|                               |         |                              | PBE0                         | -5.69             | -5.56              | -5.60              | -5.47               |
|                               |         |                              | exp <sup>13</sup>            |                   |                    |                    | -4.5                |
|                               |         |                              | <sup>3</sup> J <sub>HH</sub> | SOPPA             | 5.14               | 5.11               | 5.14                |
|                               |         |                              | <i>trans</i>                 | HRPA(D)           | 4.88               | 4.86               | 4.88                |
|                               |         |                              | B3LYP                        | 5.95              | 5.92               | 5.96               | 5.93                |

*Continued on next page*

Table S1 – *Continued from previous page*

| Molecule                     | Solvent      | SSCC                          | Method            | vacuum-<br>vacuum            | vacuum-<br>solvent | solvent-<br>vacuum | solvent-<br>solvent |       |
|------------------------------|--------------|-------------------------------|-------------------|------------------------------|--------------------|--------------------|---------------------|-------|
|                              |              |                               | BHandH            | 5.78                         | 5.75               | 5.78               | 5.75                |       |
|                              |              |                               | PBE0              | 5.76                         | 5.73               | 5.76               | 5.73                |       |
|                              |              |                               | exp <sup>13</sup> |                              |                    |                    | 5.4                 |       |
|                              |              | <sup>3</sup> J <sub>HH</sub>  | SOPPA             | 9.48                         | 9.44               | 9.49               | 9.45                |       |
|                              |              | <i>cis</i>                    | HRPA(D)           | 9.07                         | 9.03               | 9.08               | 9.05                |       |
|                              |              |                               | B3LYP             | 10.51                        | 10.46              | 10.53              | 10.49               |       |
|                              |              |                               | BHandH            | 10.73                        | 10.68              | 10.75              | 10.71               |       |
|                              |              |                               | PBE0              | 10.17                        | 10.13              | 10.19              | 10.15               |       |
|                              |              |                               | exp <sup>13</sup> |                              |                    |                    | 9.2                 |       |
|                              |              | 1,1-dichloro-<br>cyclopropane | Benzene           | <sup>2</sup> J <sub>HH</sub> | SOPPA              | -8.56              | -8.57               | -8.81 |
| HRPA(D)                      | -8.14        |                               |                   |                              | -8.15              | -8.37              | -8.38               |       |
| B3LYP                        | -7.34        |                               |                   |                              | -7.40              | -7.63              | -7.70               |       |
| BHandH                       | -7.69        |                               |                   |                              | -7.74              | -7.95              | -7.99               |       |
| PBE0                         | -8.15        |                               |                   |                              | -8.18              | -8.40              | -8.44               |       |
| exp <sup>13</sup>            |              |                               |                   |                              |                    |                    | -6.0                |       |
| <sup>3</sup> J <sub>HH</sub> | SOPPA        |                               |                   | 7.48                         | 7.49               | 7.59               | 7.60                |       |
|                              | <i>trans</i> |                               |                   | HRPA(D)                      | 7.04               | 7.04               | 7.13                | 7.13  |
|                              |              |                               |                   | B3LYP                        | 8.86               | 8.88               | 9.00                | 9.03  |
|                              |              |                               |                   | BHandH                       | 8.65               | 8.67               | 8.76                | 8.79  |
|                              |              |                               |                   | PBE0                         | 8.59               | 8.60               | 8.73                | 8.73  |
|                              |              |                               |                   | exp <sup>13</sup>            |                    |                    |                     | 8.0   |
| <sup>3</sup> J <sub>HH</sub> | SOPPA        |                               |                   | 11.31                        | 11.34              | 11.46              | 11.49               |       |
|                              | <i>cis</i>   |                               |                   | HRPA(D)                      | 10.68              | 10.70              | 10.81               | 10.83 |
|                              |              |                               |                   | B3LYP                        | 13.02              | 13.06              | 13.22               | 13.27 |
|                              |              |                               |                   | BHandH                       | 13.17              | 13.22              | 13.35               | 13.40 |

*Continued on next page*

Table S1 – *Continued from previous page*

| Molecule                                 | Solvent                 | SSCC           | Method            | vacuum-<br>vacuum | vacuum-<br>solvent | solvent-<br>vacuum | solvent-<br>solvent |
|------------------------------------------|-------------------------|----------------|-------------------|-------------------|--------------------|--------------------|---------------------|
|                                          |                         |                | PBE0              | 12.60             | 12.67              | 12.79              | 12.86               |
|                                          |                         |                | exp <sup>13</sup> |                   |                    |                    | 11.2                |
| Trans-1,2-di-<br>chlorocyclo-<br>pentane | Carbon<br>tetrachloride | $^3J_{HH}(12)$ | SOPPA             | 10.11             | 10.17              | 10.06              | 10.13               |
|                                          |                         |                | HRPA(D)           | 9.66              | 9.72               | 9.63               | 9.69                |
|                                          |                         |                | B3LYP             | 10.80             | 10.89              | 10.73              | 10.82               |
|                                          |                         |                | BHandH            | 10.97             | 11.04              | 10.94              | 11.02               |
|                                          |                         |                | PBE0              | 10.67             | 10.76              | 10.62              | 10.71               |
|                                          |                         |                | exp <sup>14</sup> |                   |                    |                    | 2.510               |
|                                          |                         | $^3J_{HH}$     | SOPPA             | 7.93              | 7.91               | 7.98               | 7.96                |
|                                          |                         | (23c + 15c)    | HRPA(D)           | 7.62              | 7.60               | 7.67               | 7.65                |
|                                          |                         |                | B3LYP             | 9.35              | 9.33               | 9.41               | 9.39                |
|                                          |                         |                | BHandH            | 9.19              | 9.16               | 9.25               | 9.22                |
|                                          |                         |                | PBE0              | 8.81              | 8.79               | 8.88               | 8.85                |
|                                          |                         |                | exp <sup>14</sup> |                   |                    |                    | 5.980               |
|                                          |                         | $^3J_{HH}$     | SOPPA             | 12.03             | 12.03              | 11.94              | 11.94               |
|                                          |                         | (23t + 15t)    | HRPA(D)           | 11.48             | 11.48              | 11.41              | 11.41               |
|                                          |                         |                | B3LYP             | 12.61             | 12.61              | 12.51              | 12.51               |
|                                          |                         |                | BHandH            | 13.24             | 13.24              | 13.17              | 13.16               |
|                                          |                         |                | PBE0              | 12.48             | 12.48              | 12.40              | 12.40               |
|                                          |                         |                | exp <sup>14</sup> |                   |                    |                    | 2.080               |
|                                          |                         | $^3J_{HH}$     | SOPPA             | 2.04              | 2.02               | 2.04               | 2.02                |
|                                          |                         | (34t + 45t)    | HRPA(D)           | 1.92              | 1.90               | 1.92               | 1.90                |
|                                          |                         |                | B3LYP             | 2.32              | 2.29               | 2.32               | 2.29                |
|                                          |                         |                | BHandH            | 2.10              | 2.07               | 2.10               | 2.07                |
|                                          |                         |                | PBE0              | 2.19              | 2.16               | 2.19               | 2.17                |

*Continued on next page*

Table S1 – *Continued from previous page*

| Molecule | Solvent | SSCC                              | Method  | vacuum-<br>vacuum | vacuum-<br>solvent | solvent-<br>vacuum | solvent-<br>solvent |
|----------|---------|-----------------------------------|---------|-------------------|--------------------|--------------------|---------------------|
|          |         | exp <sup>14</sup>                 |         |                   |                    |                    | 7.470               |
|          |         | <sup>3</sup> J <sub>HH</sub>      | SOPPA   | 12.80             | 12.76              | 12.81              | 12.77               |
|          |         | (34c + 45c)                       | HRPA(D) | 12.25             | 12.21              | 12.25              | 12.22               |
|          |         |                                   | B3LYP   | 14.21             | 14.17              | 14.24              | 14.20               |
|          |         |                                   | BHandH  | 14.73             | 14.69              | 14.76              | 14.71               |
|          |         |                                   | PBE0    | 13.70             | 13.66              | 13.74              | 13.69               |
|          |         | exp <sup>14</sup>                 |         |                   |                    |                    | 8.880               |
|          |         | <sup>3</sup> J <sub>HH</sub>      | SOPPA   | 10.58             | 10.57              | 10.59              | 10.58               |
|          |         | (34c + 45c)                       | HRPA(D) | 10.15             | 10.14              | 10.15              | 10.15               |
|          |         |                                   | B3LYP   | 11.80             | 11.79              | 11.82              | 11.81               |
|          |         |                                   | BHandH  | 12.09             | 12.08              | 12.10              | 12.09               |
|          |         |                                   | PBE0    | 11.29             | 11.28              | 11.31              | 11.30               |
|          |         | exp <sup>14</sup>                 |         |                   |                    |                    | 10.030              |
|          |         | <sup>3</sup> J <sub>HH</sub>      | SOPPA   | 9.13              | 9.06               | 9.09               | 9.02                |
|          |         | (34t + 45t)                       | HRPA(D) | 8.70              | 8.63               | 8.65               | 8.59                |
|          |         |                                   | B3LYP   | 9.41              | 9.34               | 9.37               | 9.29                |
|          |         |                                   | BHandH  | 10.02             | 9.95               | 9.99               | 9.91                |
|          |         |                                   | PBE0    | 9.30              | 9.22               | 9.26               | 9.19                |
|          |         | exp <sup>14</sup>                 |         |                   |                    |                    | 4.040               |
|          | Benzene | <sup>3</sup> J <sub>HH</sub> (12) | SOPPA   | 10.11             | 10.17              | 10.06              | 10.13               |
|          |         |                                   | HRPA(D) | 9.66              | 9.72               | 9.63               | 9.69                |
|          |         |                                   | B3LYP   | 10.80             | 10.89              | 10.73              | 10.82               |
|          |         |                                   | BHandH  | 10.97             | 11.05              | 10.94              | 11.02               |
|          |         |                                   | PBE0    | 10.67             | 10.76              | 10.62              | 10.71               |
|          |         | exp <sup>14</sup>                 |         |                   |                    |                    | 2.860               |

*Continued on next page*



Table S1 – *Continued from previous page*

| Molecule | Solvent | SSCC        | Method            | vacuum- | vacuum- | solvent- | solvent- |
|----------|---------|-------------|-------------------|---------|---------|----------|----------|
|          |         |             |                   | vacuum  | solvent | vacuum   | solvent  |
|          |         | $^3J_{HH}$  | SOPPA             | 7.93    | 7.91    | 7.98     | 7.96     |
|          |         | (23c + 15c) | HRPA(D)           | 7.62    | 7.61    | 7.67     | 7.65     |
|          |         |             | B3LYP             | 9.35    | 9.33    | 9.41     | 9.39     |
|          |         |             | BHandH            | 9.19    | 9.16    | 9.25     | 9.22     |
|          |         |             | PBE0              | 8.81    | 8.79    | 8.88     | 8.85     |
|          |         |             | exp <sup>14</sup> |         |         |          | 6.610    |
|          |         | $^3J_{HH}$  | SOPPA             | 12.03   | 12.03   | 11.94    | 11.94    |
|          |         | (23t + 15t) | HRPA(D)           | 11.48   | 11.48   | 11.41    | 11.41    |
|          |         |             | B3LYP             | 12.61   | 12.61   | 12.51    | 12.51    |
|          |         |             | BHandH            | 13.24   | 13.24   | 13.17    | 13.16    |
|          |         |             | PBE0              | 12.48   | 12.49   | 12.40    | 12.40    |
|          |         |             | exp <sup>14</sup> |         |         |          | 3.280    |
|          |         | $^3J_{HH}$  | SOPPA             | 2.04    | 2.02    | 2.04     | 2.02     |
|          |         | (34t + 45t) | HRPA(D)           | 1.92    | 1.90    | 1.92     | 1.90     |
|          |         |             | B3LYP             | 2.32    | 2.29    | 2.33     | 2.30     |
|          |         |             | BHandH            | 2.10    | 2.07    | 2.10     | 2.07     |
|          |         |             | PBE0              | 2.19    | 2.16    | 2.19     | 2.17     |
|          |         |             | exp <sup>14</sup> |         |         |          | 7.080    |
|          |         | $^3J_{HH}$  | SOPPA             | 12.80   | 12.76   | 12.81    | 12.77    |
|          |         | (34c + 45c) | HRPA(D)           | 12.25   | 12.21   | 12.25    | 12.22    |
|          |         |             | B3LYP             | 14.21   | 14.17   | 14.24    | 14.20    |
|          |         |             | BHandH            | 14.73   | 14.69   | 14.76    | 14.71    |
|          |         |             | PBE0              | 13.70   | 13.66   | 13.74    | 13.70    |
|          |         |             | exp <sup>14</sup> |         |         |          | 9.090    |
|          |         | $^3J_{HH}$  | SOPPA             | 10.58   | 10.57   | 10.59    | 10.58    |

*Continued on next page*

Table S1 – *Continued from previous page*

| Molecule | Solvent      | SSCC                              | Method            | vacuum-<br>vacuum | vacuum-<br>solvent | solvent-<br>vacuum | solvent-<br>solvent |
|----------|--------------|-----------------------------------|-------------------|-------------------|--------------------|--------------------|---------------------|
|          |              | (34c + 45c)                       | HRPA(D)           | 10.15             | 10.14              | 10.15              | 10.15               |
|          |              |                                   | B3LYP             | 11.80             | 11.80              | 11.82              | 11.81               |
|          |              |                                   | BHandH            | 12.09             | 12.08              | 12.10              | 12.09               |
|          |              |                                   | PBE0              | 11.29             | 11.28              | 11.31              | 11.30               |
|          |              |                                   | exp <sup>14</sup> |                   |                    |                    | 9.830               |
|          |              | <sup>3</sup> J <sub>HH</sub>      | SOPPA             | 9.13              | 9.06               | 9.08               | 9.02                |
|          |              | (34t + 45t)                       | HRPA(D)           | 8.70              | 8.64               | 8.65               | 8.60                |
|          |              |                                   | B3LYP             | 9.41              | 9.34               | 9.37               | 9.29                |
|          |              |                                   | BHandH            | 10.02             | 9.95               | 9.99               | 9.91                |
|          |              |                                   | PBE0              | 9.30              | 9.22               | 9.26               | 9.19                |
|          |              |                                   | exp <sup>14</sup> |                   |                    |                    | 4.210               |
|          | Acetonitrile | <sup>3</sup> J <sub>HH</sub> (12) | SOPPA             | 10.11             | 10.23              | 10.01              | 10.14               |
|          |              |                                   | HRPA(D)           | 9.66              | 9.78               | 9.59               | 9.71                |
|          |              |                                   | B3LYP             | 10.80             | 10.99              | 10.66              | 10.84               |
|          |              |                                   | BHandH            | 10.97             | 11.12              | 10.91              | 11.06               |
|          |              |                                   | PBE0              | 10.67             | 10.84              | 10.56              | 10.73               |
|          |              |                                   | exp <sup>14</sup> |                   |                    |                    | 3.340               |
|          |              | <sup>3</sup> J <sub>HH</sub>      | SOPPA             | 7.93              | 7.89               | 8.03               | 7.99                |
|          |              | (23c + 15c)                       | HRPA(D)           | 7.62              | 7.59               | 7.71               | 7.68                |
|          |              |                                   | B3LYP             | 9.35              | 9.31               | 9.47               | 9.43                |
|          |              |                                   | BHandH            | 9.19              | 9.13               | 9.30               | 9.24                |
|          |              |                                   | PBE0              | 8.81              | 8.76               | 8.93               | 8.88                |
|          |              |                                   | exp <sup>14</sup> |                   |                    |                    | 6.310               |
|          |              | <sup>3</sup> J <sub>HH</sub>      | SOPPA             | 12.03             | 12.03              | 11.87              | 11.86               |
|          |              | (23t + 15t)                       | HRPA(D)           | 11.48             | 11.48              | 11.34              | 11.33               |

*Continued on next page*

Table S1 – *Continued from previous page*

| Molecule | Solvent | SSCC                         | Method            | vacuum- | vacuum- | solvent- | solvent- |
|----------|---------|------------------------------|-------------------|---------|---------|----------|----------|
|          |         |                              |                   | vacuum  | solvent | vacuum   | solvent  |
|          |         |                              | B3LYP             | 12.61   | 12.62   | 12.41    | 12.41    |
|          |         |                              | BHandH            | 13.24   | 13.23   | 13.10    | 13.08    |
|          |         |                              | PBE0              | 12.48   | 12.49   | 12.32    | 12.32    |
|          |         |                              | exp <sup>14</sup> |         |         |          | 3.910    |
|          |         | <sup>3</sup> J <sub>HH</sub> | SOPPA             | 2.04    | 2.00    | 2.05     | 2.01     |
|          |         | (34 <i>t</i> + 45 <i>t</i> ) | HRPA(D)           | 1.92    | 1.88    | 1.93     | 1.89     |
|          |         |                              | B3LYP             | 2.32    | 2.26    | 2.33     | 2.27     |
|          |         |                              | BHandH            | 2.10    | 2.05    | 2.11     | 2.06     |
|          |         |                              | PBE0              | 2.19    | 2.14    | 2.20     | 2.15     |
|          |         |                              | exp <sup>14</sup> |         |         |          | 6.540    |
|          |         | <sup>3</sup> J <sub>HH</sub> | SOPPA             | 12.80   | 12.73   | 12.82    | 12.75    |
|          |         | (34 <i>c</i> + 45 <i>c</i> ) | HRPA(D)           | 12.25   | 12.18   | 12.26    | 12.20    |
|          |         |                              | B3LYP             | 14.21   | 14.13   | 14.27    | 14.20    |
|          |         |                              | BHandH            | 14.73   | 14.64   | 14.78    | 14.69    |
|          |         |                              | PBE0              | 13.70   | 13.62   | 13.77    | 13.69    |
|          |         |                              | exp <sup>14</sup> |         |         |          | 9.140    |
|          |         | <sup>3</sup> J <sub>HH</sub> | SOPPA             | 10.58   | 10.57   | 10.59    | 10.59    |
|          |         | (34 <i>c</i> + 45 <i>c</i> ) | HRPA(D)           | 10.15   | 10.14   | 10.16    | 10.15    |
|          |         |                              | B3LYP             | 11.80   | 11.79   | 11.84    | 11.82    |
|          |         |                              | BHandH            | 12.09   | 12.07   | 12.12    | 12.10    |
|          |         |                              | PBE0              | 11.29   | 11.28   | 11.33    | 11.32    |
|          |         |                              | exp <sup>14</sup> |         |         |          | 9.810    |
|          |         | <sup>3</sup> J <sub>HH</sub> | SOPPA             | 9.13    | 9.00    | 9.05     | 8.92     |
|          |         | (34 <i>t</i> + 45 <i>t</i> ) | HRPA(D)           | 8.70    | 8.58    | 8.62     | 8.50     |
|          |         |                              | B3LYP             | 9.41    | 9.26    | 9.33     | 9.18     |

*Continued on next page*

Table S1 – *Continued from previous page*

| Molecule | Solvent | SSCC | Method            | vacuum- | vacuum- | solvent- | solvent- |
|----------|---------|------|-------------------|---------|---------|----------|----------|
|          |         |      |                   | vacuum  | solvent | vacuum   | solvent  |
|          |         |      | BHandH            | 10.02   | 9.88    | 9.95     | 9.81     |
|          |         |      | PBE0              | 9.30    | 9.15    | 9.23     | 9.08     |
|          |         |      | exp <sup>14</sup> |         |         |          | 5.030    |

<sup>a</sup> Assuming that they have switched cis and trans in the article

## References

- (1) Kupka, T. Complete basis set prediction of methanol isotropic nuclear magnetic shieldings and indirect nuclear spin-spin coupling constants (SSCC) using polarization-consistent and XZP basis sets and B3LYP and BHandH density functionals. *Magn. Reson. Chem.* **2009**, *47*, 674–683.
- (2) Rummens, F. H. A.; Simon, C.; Coupry, C.; Lumbroso-Bader, N. Spectroscopic studies on olefins. VII-propene and 3-methylbutene-1; proton NMR coupling constants as a function of solvent and temperature in relation to molecular geometry. *Org. Magn. Reson.* **1980**, *13*, 33–39.
- (3) Sørensen, O. W.; Bildsøe, H.; Jakobsen, H. J. Natural-abundance proton-coupled satellite spectra in <sup>13</sup>C NMR from double selective population transfer. The flip angle effect. *J. Magn. Reson.* **1981**, *45*, 325–336.
- (4) Gray, G. A.; Maciel, G. E.; Ellis, P. D. Studies of <sup>13</sup>C-<sup>13</sup>C coupling constants. II. Acetonitrile and related compounds. *J. Magn. Reson.* **1969**, *1*, 407–417.
- (5) Diehl, P.; Jokisaari, J.; Amrein, J.; Väänänen, T.; Pyykkö, P. Determination of the <sup>13</sup>C-<sup>13</sup>C and <sup>13</sup>C-<sup>15</sup>N coupling constant anisotropies of acetonitrile partially oriented by nematic liquid crystals. *J. Magn. Reson.* **1982**, *48*, 495–502.

- (6) Kondo, M.; Watanabe, S.; Ando, I. The effect of dielectric constant upon the  $^1J_{CH}$  spin coupling constants in organic compounds. *Mol. Phys.* **1979**, *37*, 1521–1528.
- (7) Ebraheem, K. A. K.; Shargi, S. N.; Kadum, S. A. INDO-SCPT calculations of the solvent dependence of some carbon-proton spin-spin coupling constants. *Monatsh. Chem.* **1989**, *120*, 923–930.
- (8) Kalinowski, H.-O.; Berger, S.; Braun, S. *Carbon-13 NMR spectroscopy*; Georg Thieme Verlag: Stuttgart - New York, 1984.
- (9) Suntioinen, S.; Laatikainen, R. Solvent Effects on the  $^1H$ - $^1H$ ,  $^1H$ - $^{19}F$  and  $^{19}F$ - $^{19}F$  Coupling Constants of Fluorobenzene and 1,2-difluorobenzene. *Magn. Reson. Chem.* **1992**, *30*, 415–419.
- (10) Watanabe, S.; Ando, I. Effect of a polar solvent on the  $^1J_{CH}$  spin-coupling constants in chlorine-substituted ethanes. *Bull. Chem. Soc. Jpn.* **1980**, *53*, 1257–1262.
- (11) Abboud, J. M.; Boyer, G.; Elguero, J.; Cabildo, P.; Claramunt, R. Solvent effects on the  $^{13}C$  NMR parameters ( $\delta^{13}C$  chemical shifts and  $^1H$ - $^{13}C$  coupling constants) of 1-methylpyrazole and 1-methylimidazole. *Spectrochim. Acta* **1991**, *47*, 785–790.
- (12) Park, S. M.; So, H.  $^1H$  NMR Study of Aziridine Derivatives Coordinated to the Paramagnetic Undecatungstocobalto(II)silicate and -nickelo(II)silicate Anions. *Bull. Korean Chem. Soc.* **1997**, *18*, 1002–1006.
- (13) Patel, D.; Howden, M.; Roberts, J. Nuclear Magnetic Resonance Spectroscopy. Cyclopropane Derivatives. *J. Am. Chem. Soc.* **1963**, *85*, 3218–3223.
- (14) Zubkov, S.; Chertkov, V. Experimental Determination of Pseudorotation Potentials for Disubstituted Cyclopentanes Based on Spin-Spin Coupling Constants. *Int. J. Mol. Sci* **2003**, *4*, 107–118.
